# Supplementary material for: Whole genome sequencing of Ethiopian highlanders reveals conserved hypoxia tolerance genes
Source: PubMed Central journal article supplement (PMC4054780; doi:10.1186/gb-2014-15-2-r36), 2014-02-20
Supplement: gb-2014-15-2-r36-S6.pdf [file gb-2014-15-2-r36-S6.pdf]

Table S1. Regions identified as significant under a 0.1% genome wide false discovery rate.

| Test         | Base Pairs<br>(Amhara) | Regions<br>(distinct) | Genes      | Base Pairs<br>(Oromos) | Regions<br>(distinct) | Genes      |
|--------------|------------------------|-----------------------|------------|------------------------|-----------------------|------------|
| $S_f$        | 7,928,000              | 99                    | 88         | 7,858,000              | 95                    | 99         |
| $S_\pi$      | 8,018,000              | 98                    | 89         | 8,740,000              | 114                   | 110        |
| $F_{st}$     | 6,824,000              | 78                    | 71         | 6,442,000              | 68                    | 49         |
| $PBS$        | 7,670,000              | 93                    | 79         | 7,406,000              | 88                    | 80         |
| <b>Total</b> | <b>23,950,000</b>      | <b>261</b>            | <b>272</b> | <b>24,744,000</b>      | <b>260</b>            | <b>271</b> |
