# Supplementary material for: Whole genome sequencing of Ethiopian highlanders reveals conserved hypoxia tolerance genes
Source: PubMed Central journal article supplement (PMC4054780; doi:10.1186/gb-2014-15-2-r36), 2014-02-20
Supplement: gb-2014-15-2-r36-S9.pdf [file gb-2014-15-2-r36-S9.pdf]

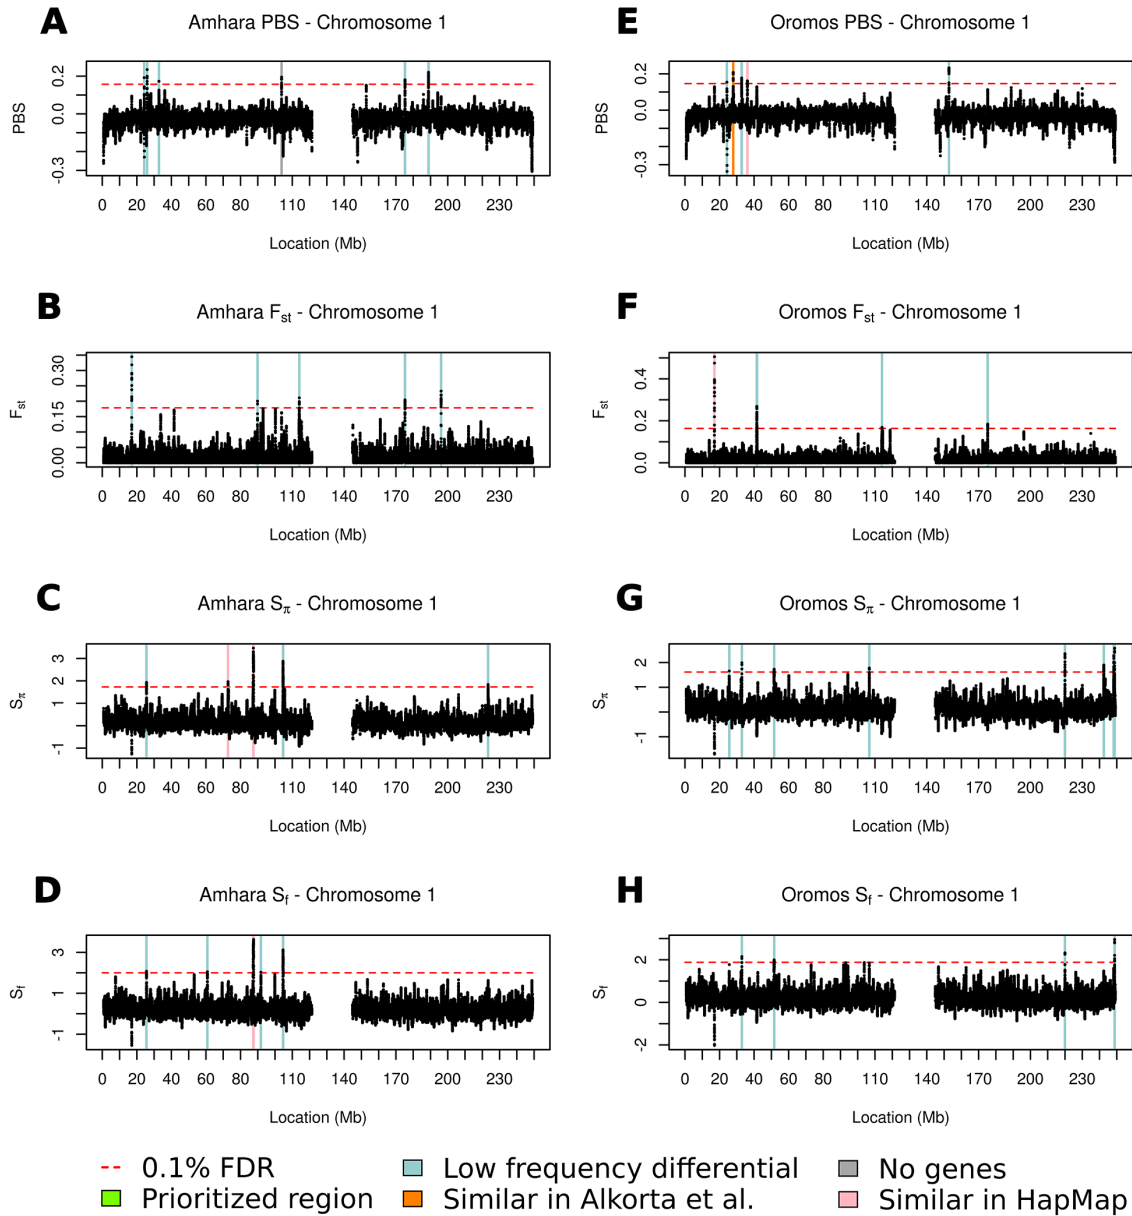

**Chromosome 1. Test statistic values in the Amhara (A-D) and Oromos (E-H) populations.** The tests shown are  $PBS$  (A, E),  $F_{st}$  (B, F),  $S_{\pi}$  (C, G), and  $S_f$  (D, H). The four filters that were used to shortlist the regions are color-coded. Regions above the 0.1% FDR that passed all filters are shown in green.

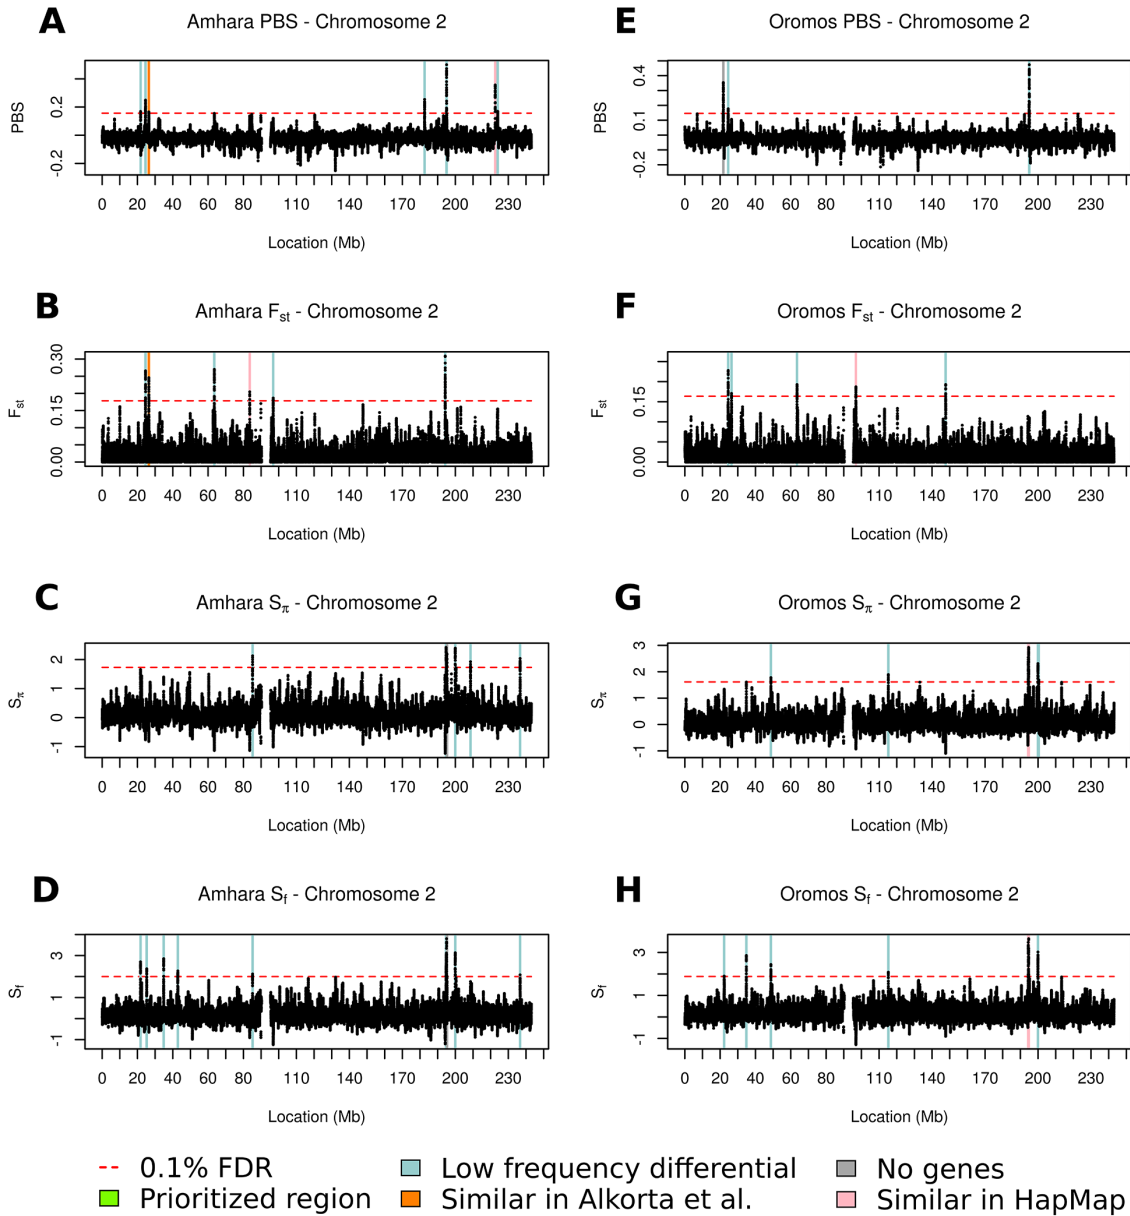

**Chromosome 2. Test statistic values in the Amhara (A-D) and Oromos (E-H) populations.** The tests shown are  $PBS$  (A, E),  $F_{st}$  (B, F),  $S_{\pi}$  (C, G), and  $S_f$  (D, H). The four prioritization filters that were used to shortlist the regions are color-coded. Regions above the 0.1% FDR that passed all filters are shown in green.

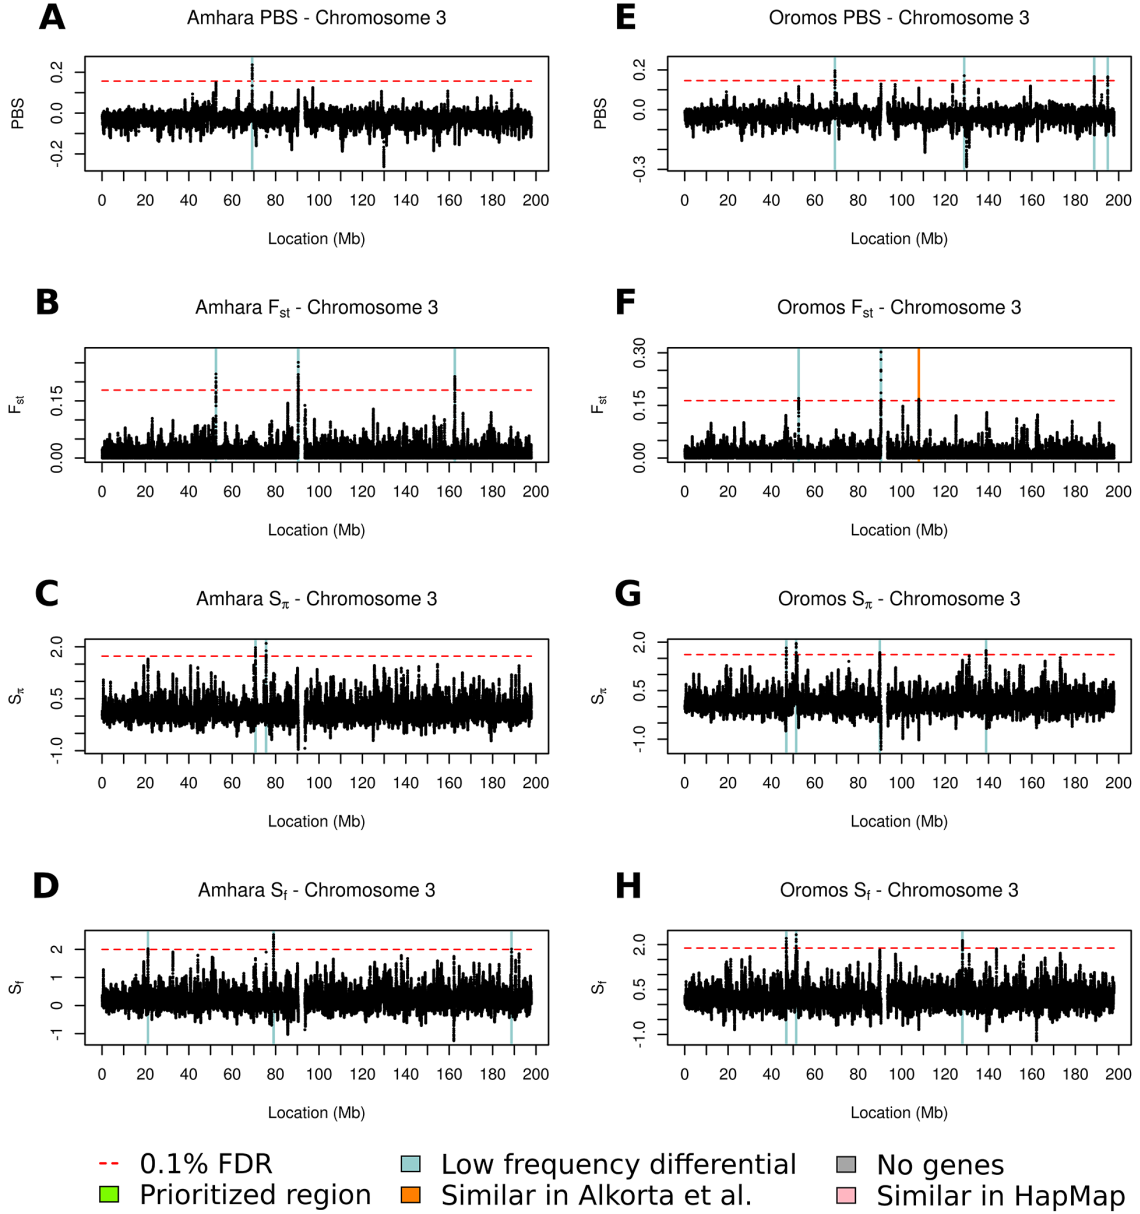

**Chromosome 3. Test statistic values in the Amhara (A-D) and Oromos (E-H) populations.** The tests shown are  $PBS$  (A, E),  $F_{st}$  (B, F),  $S_{\pi}$  (C, G), and  $S_f$  (D, H). The four prioritization filters that were used to shortlist the regions are color-coded. Regions above the 0.1% FDR that passed all filters are shown in green.

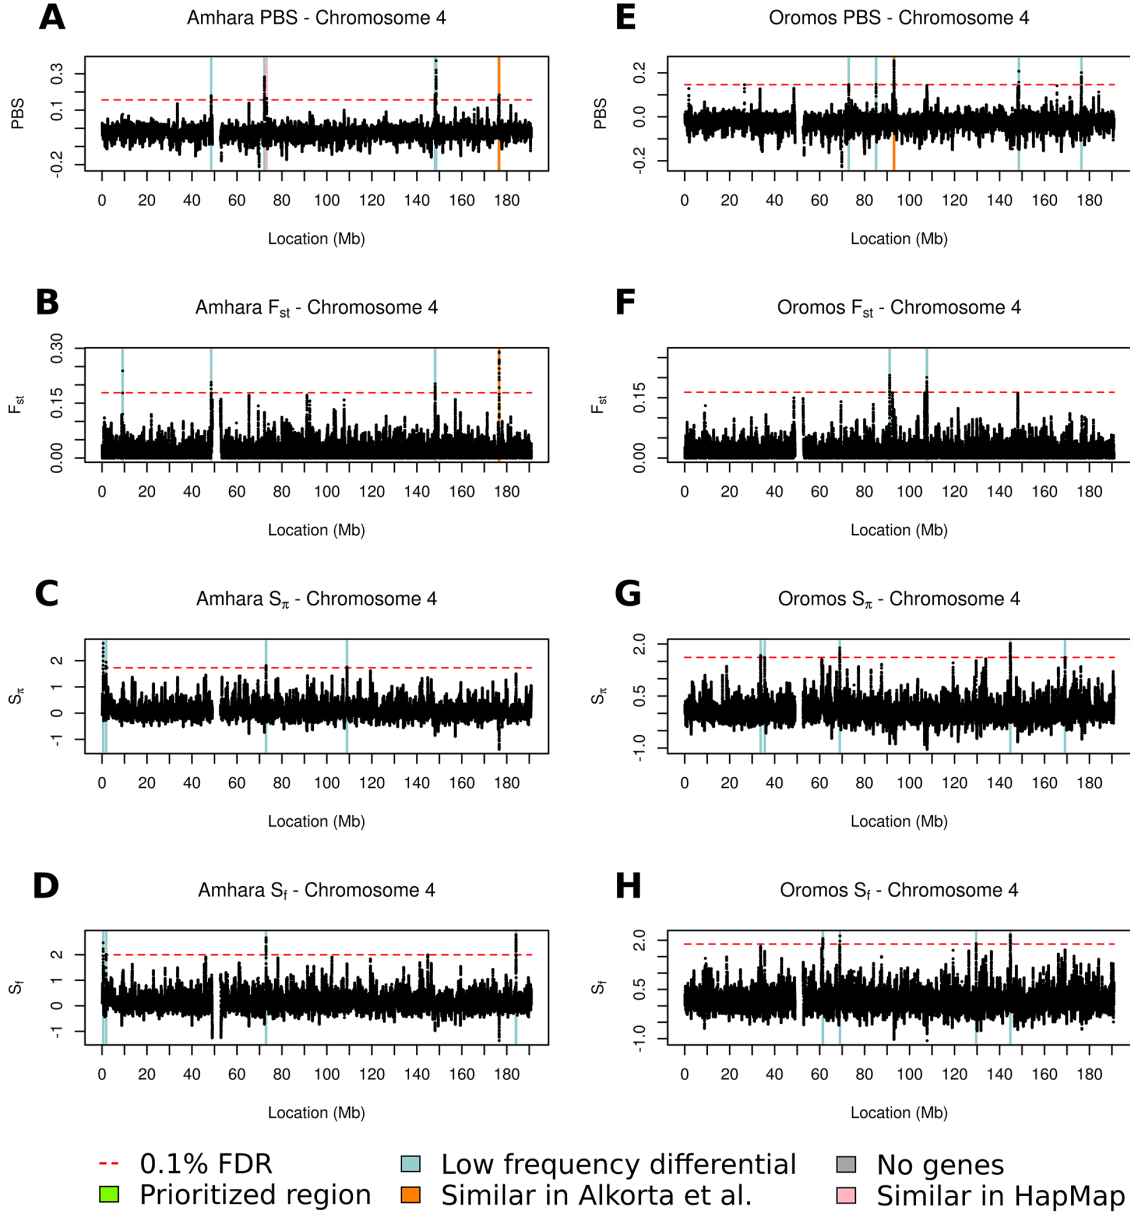

**Chromosome 4. Test statistic values in the Amhara (A-D) and Oromos (E-H) populations.** The tests shown are  $PBS$  (A, E),  $F_{st}$  (B, F),  $S_{\pi}$  (C, G), and  $S_f$  (D, H). The four prioritization filters that were used to shortlist the regions are color-coded. Regions above the 0.1% FDR that passed all filters are shown in green.



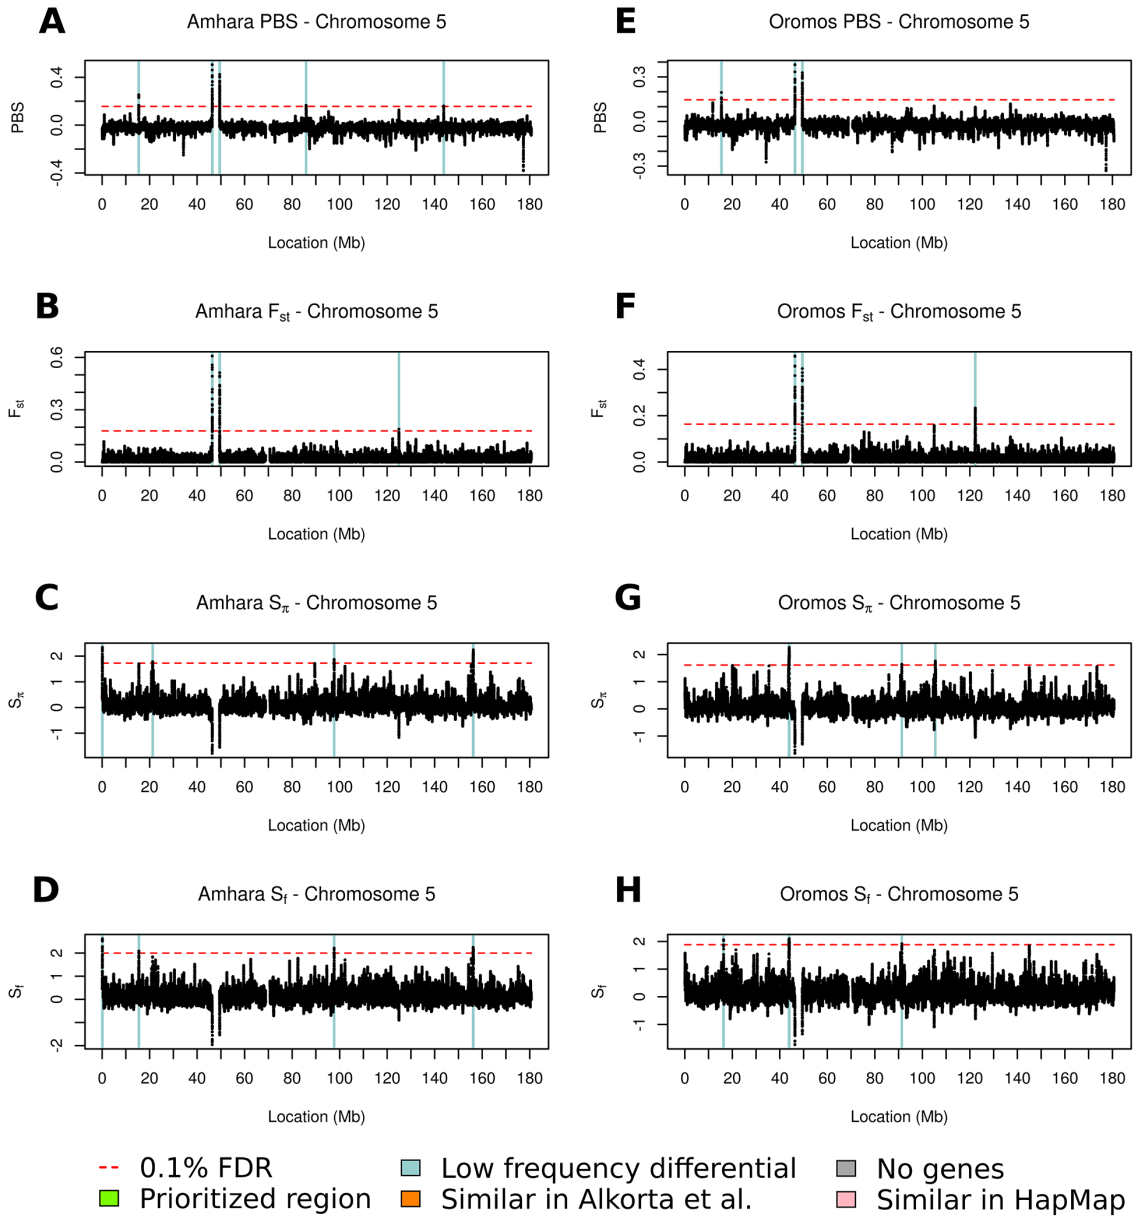

**Chromosome 5. Test statistic values in the Amhara (A-D) and Oromos (E-H) populations.** The tests shown are  $PBS$  (A, E),  $F_{st}$  (B, F),  $S_{\pi}$  (C, G), and  $S_f$  (D, H). The four prioritization filters that were used to shortlist the regions are color-coded. Regions above the 0.1% FDR that passed all filters are shown in green.

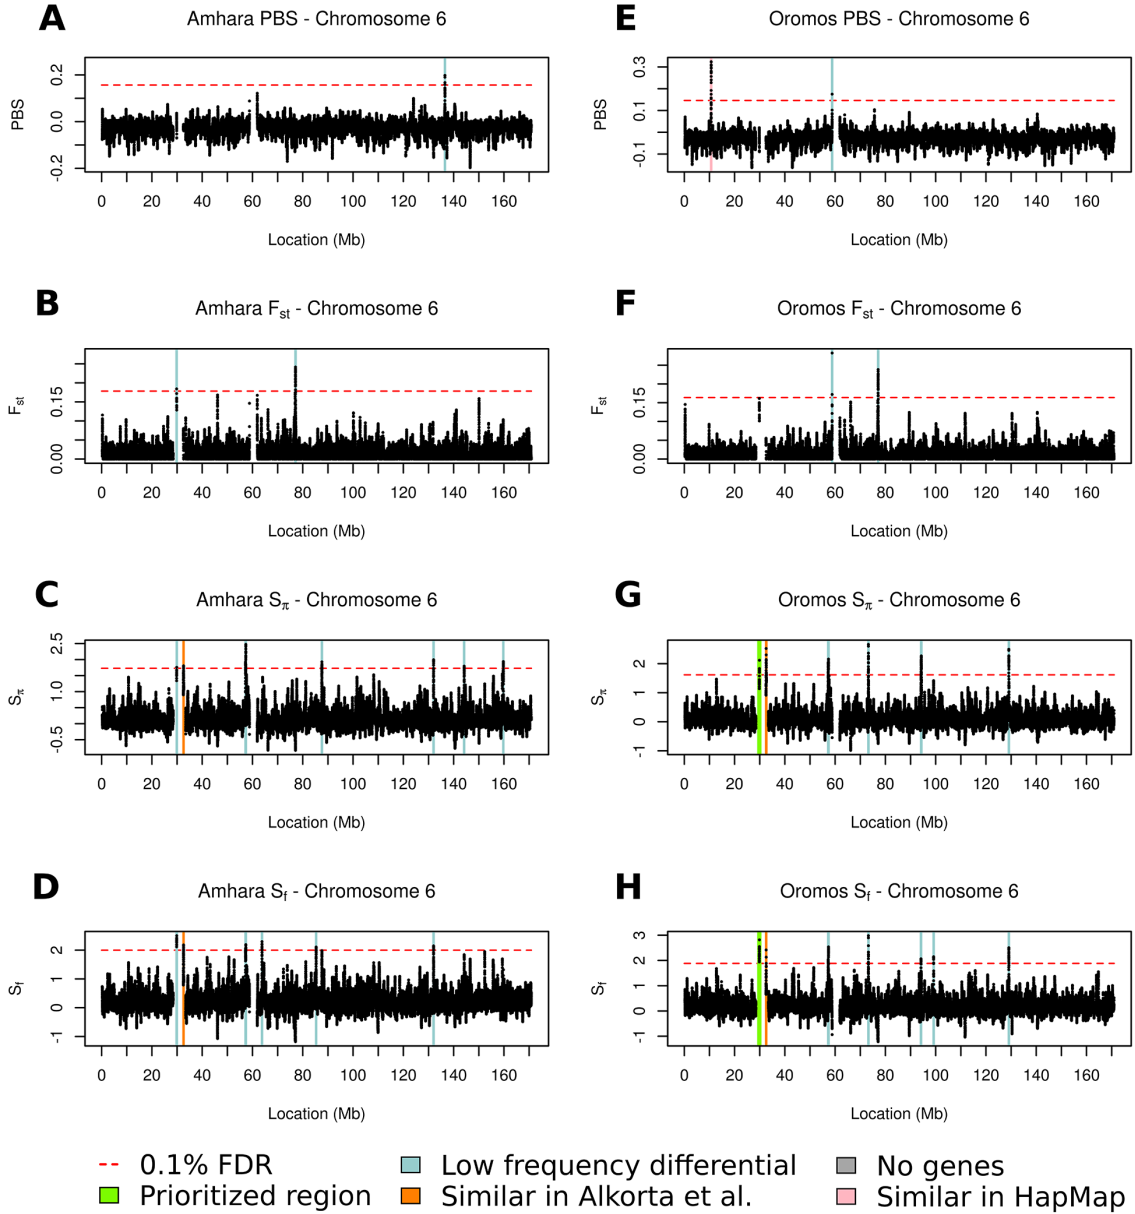

**Chromosome 6. Test statistic values in the Amhara (A-D) and Oromos (E-H) populations.** The tests shown are  $PBS$  (A, E),  $F_{st}$  (B, F),  $S_{\pi}$  (C, G), and  $S_f$  (D, H). The four prioritization filters that were used to shortlist the regions are color-coded. Regions above the 0.1% FDR that passed all filters are shown in green. Specifically, the green region in the Oromos vs. LWK  $S_{\pi}$  and  $S_f$  statistics, position 29.8M, contains four genes (*HLA-G*, *HLA-H*, *HCG2P7*, and *HCG4P6*) and has  $S_{\pi}$  and  $S_f$  values of 2.12 and 2.82, respectively.

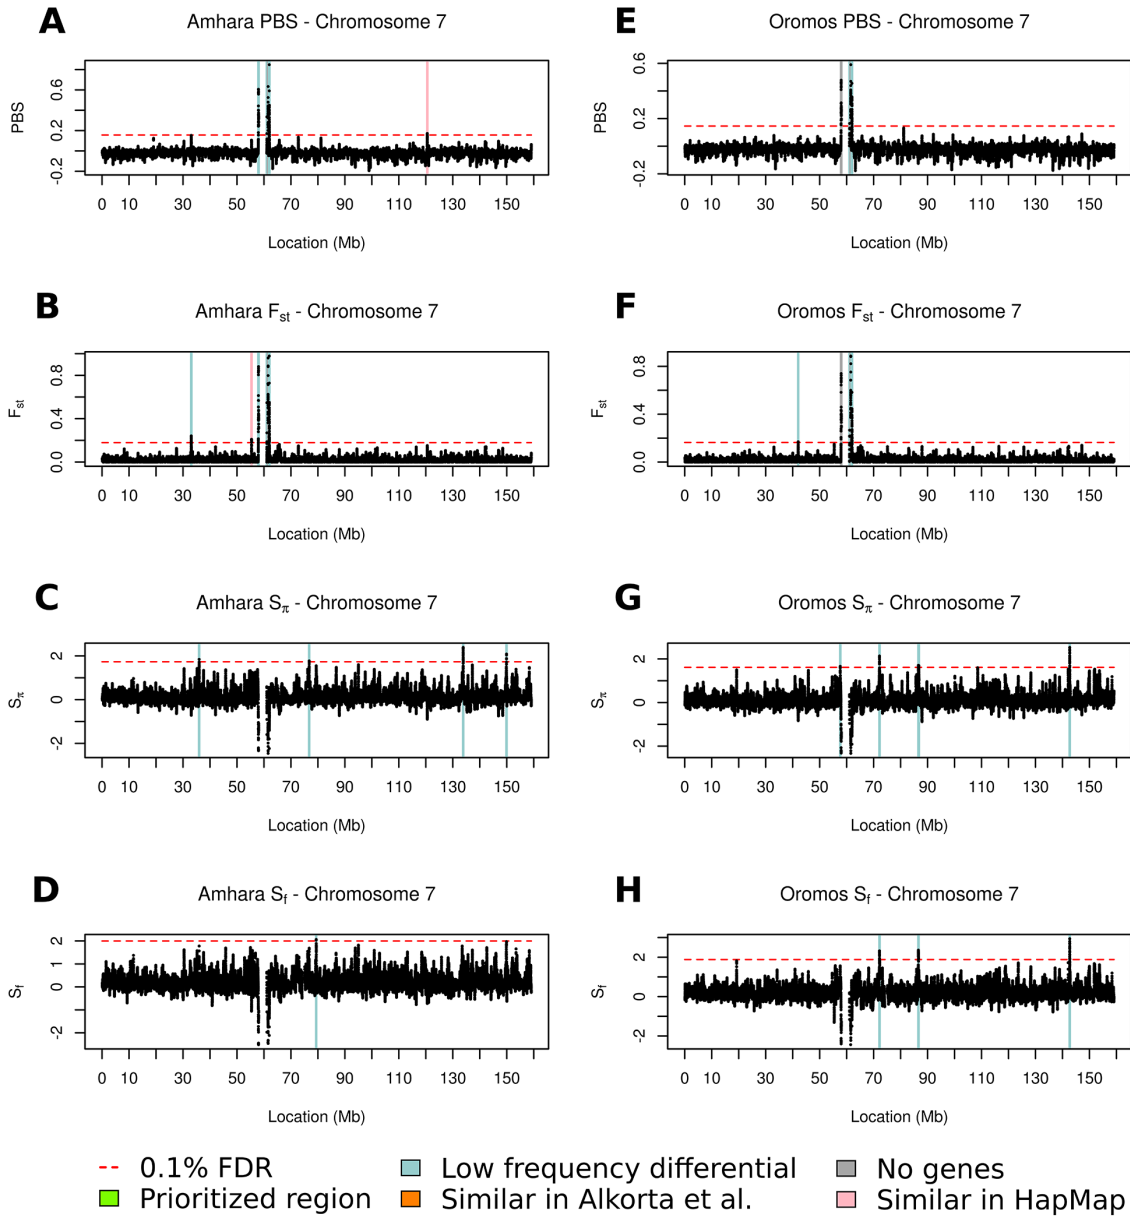

**Chromosome 7. Test statistic values in the Amhara (A-D) and Oromos (E-H) populations.** The tests shown are  $PBS$  (A, E),  $F_{st}$  (B, F),  $S_{\pi}$  (C, G), and  $S_f$  (D, H). The four prioritization filters that were used to shortlist the regions are color-coded. Regions above the 0.1% FDR that passed all filters are shown in green.

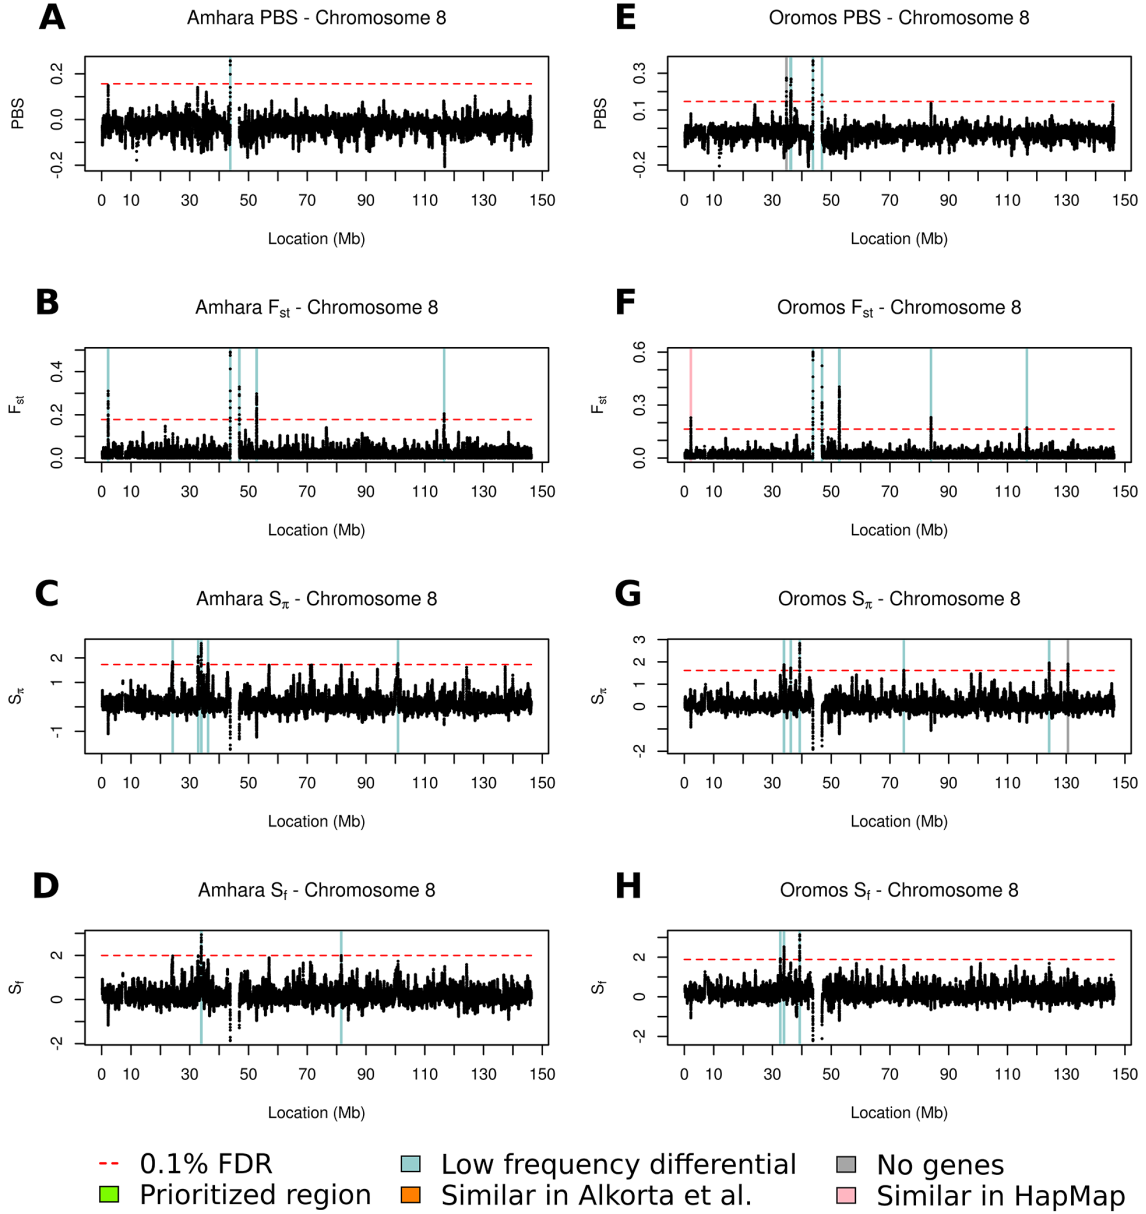

**Chromosome 8. Test statistic values in the Amhara (A-D) and Oromos (E-H) populations.** The tests shown are  $PBS$  (A, E),  $F_{st}$  (B, F),  $S_{\pi}$  (C, G), and  $S_f$  (D, H). The four prioritization filters that were used to shortlist the regions are color-coded. Regions above the 0.1% FDR that passed all filters are shown in green.

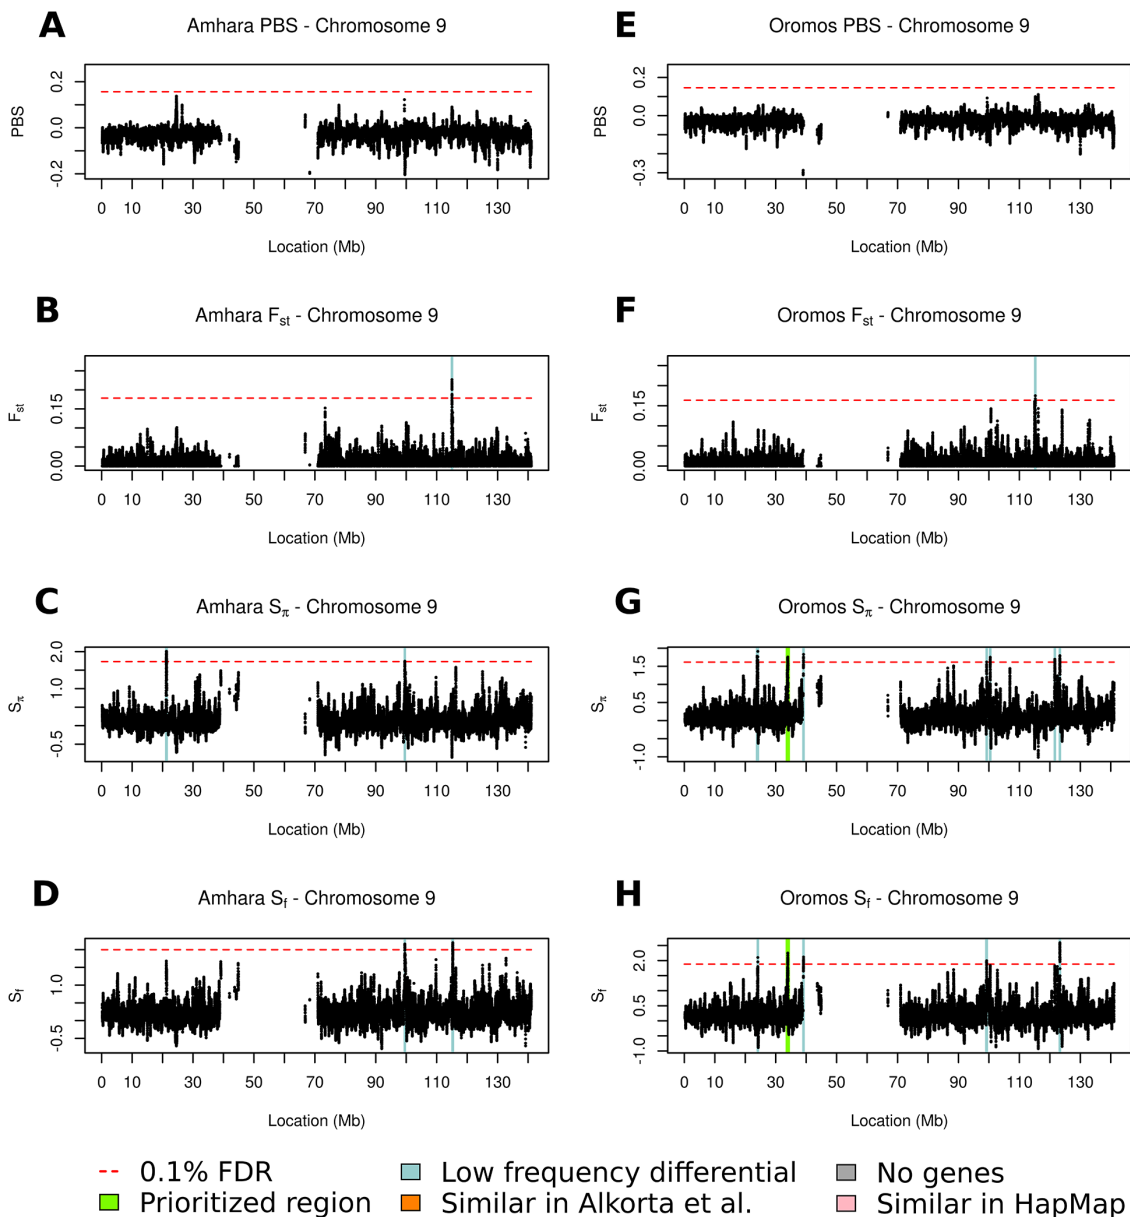

**Chromosome 9. Test statistic values in the Amhara (A-D) and Oromos (E-H) populations.** The tests shown are  $PBS$  (A, E),  $F_{st}$  (B, F),  $S_{\pi}$  (C, G), and  $S_f$  (D, H). The four prioritization filters that were used to shortlist the regions are color-coded. Regions above the 0.1% FDR that passed all filters are shown in green. Specifically, the green region in the Oromos vs. LWK  $S_{\pi}$  and  $S_f$  statistics, position 34M, contains four genes (*UBE2R2*, *UBAP2*, *SNORD121B*, and *SNORD121A*) and has  $S_{\pi}$  and  $S_f$  values of 1.76 and 2.25, respectively.

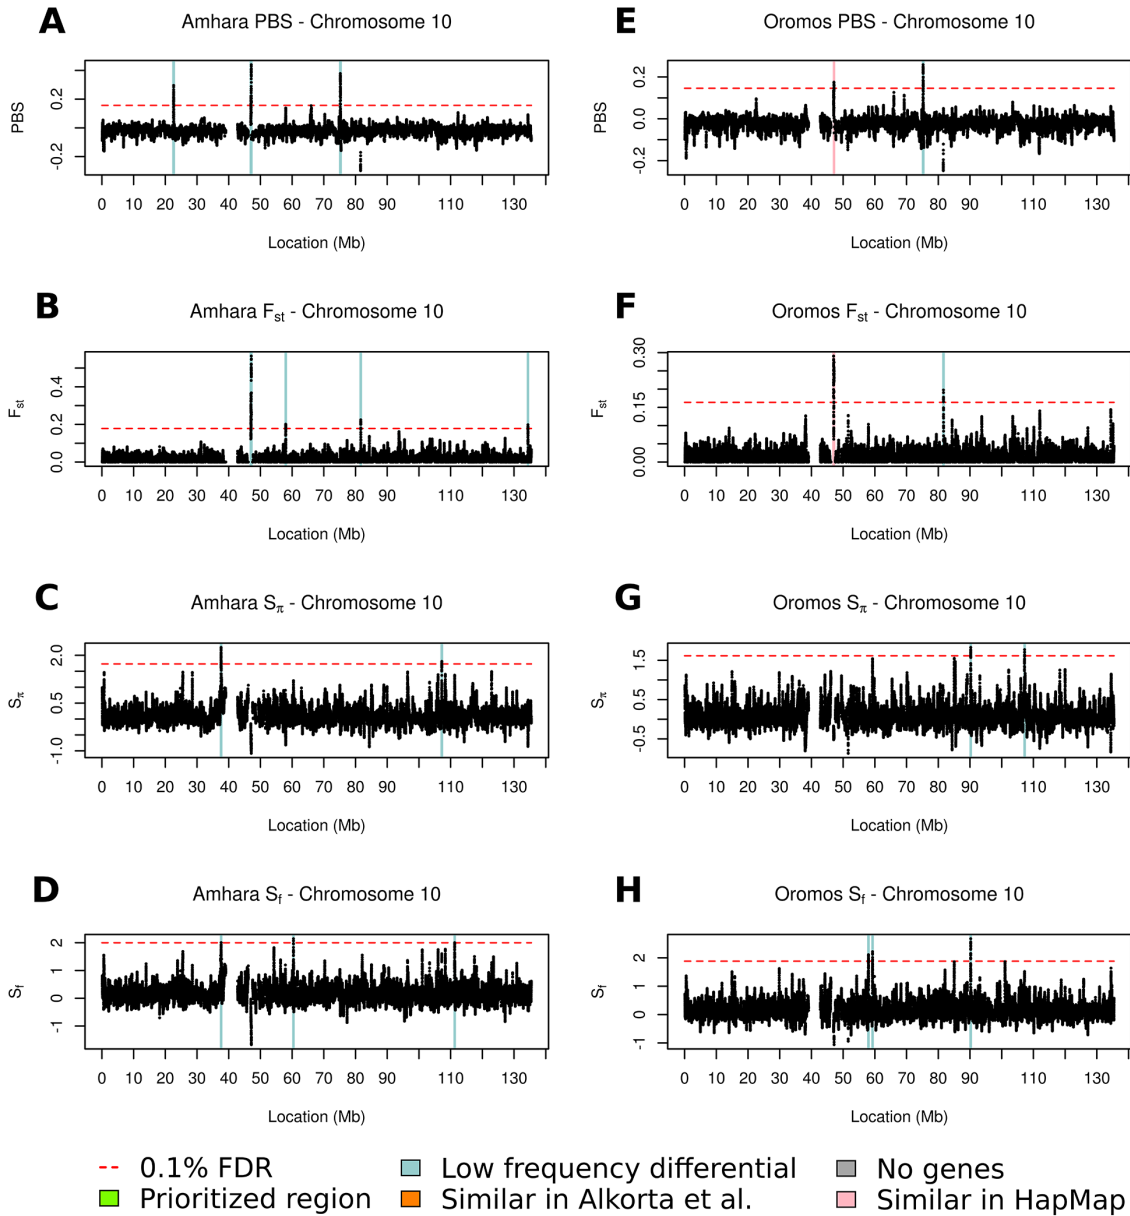

**Chromosome 10. Test statistic values in the Amhara (A-D) and Oromos (E-H) populations.** The tests shown are  $PBS$  (A, E),  $F_{st}$  (B, F),  $S_{\pi}$  (C, G), and  $S_f$  (D, H). The four prioritization filters that were used to shortlist the regions are color-coded. Regions above the 0.1% FDR that passed all filters are shown in green.

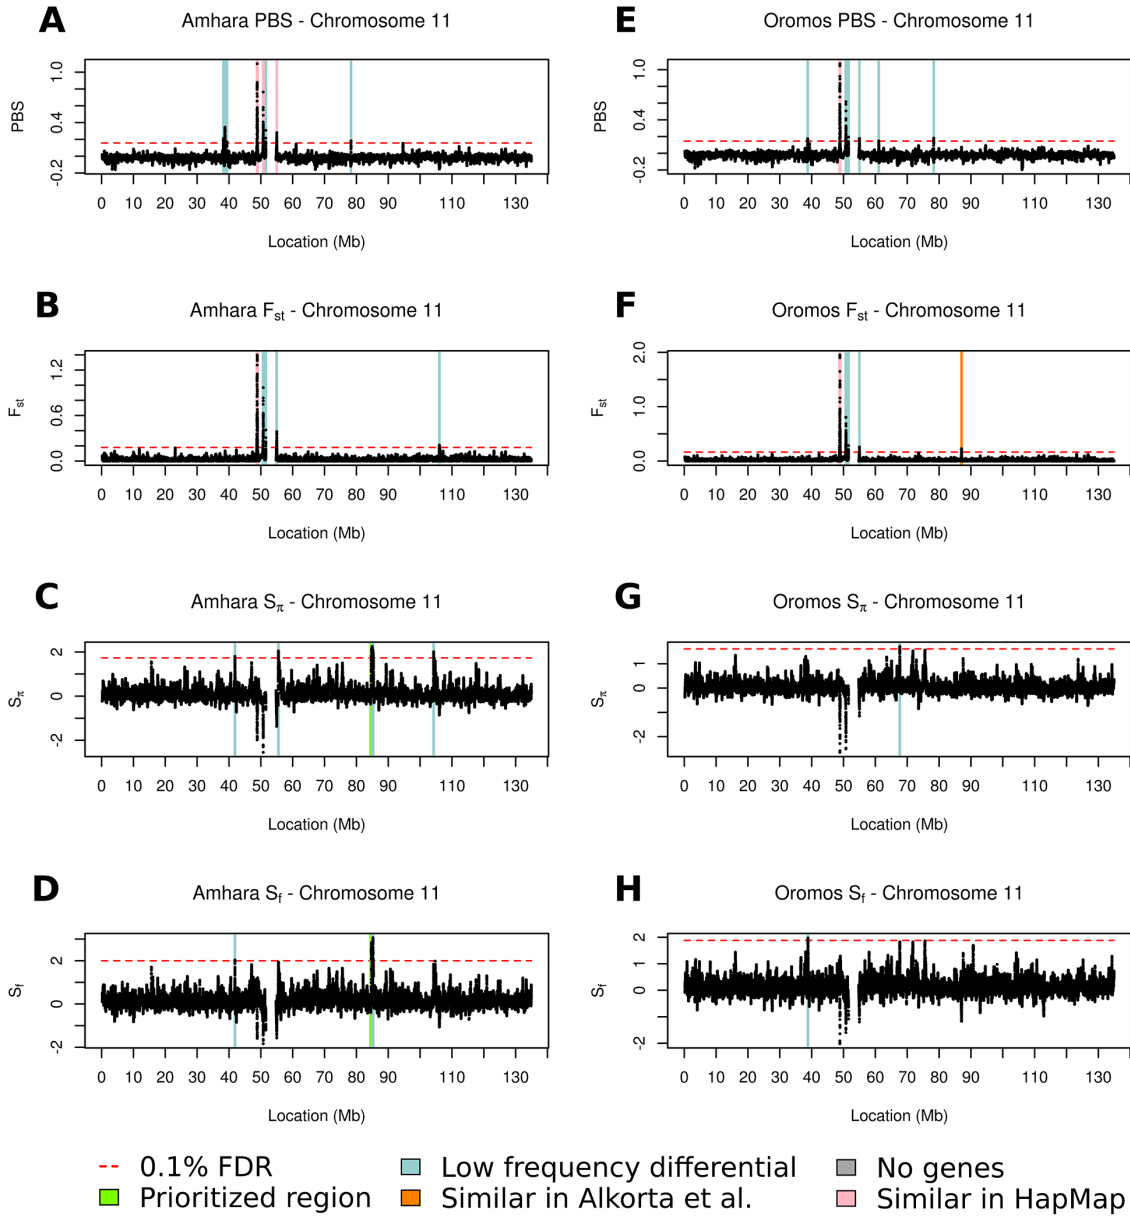

**Chromosome 11. Test statistic values in the Amhara (A-D) and Oromos (E-H) populations.** The tests shown are  $PBS$  (A, E),  $F_{st}$  (B, F),  $S_{\pi}$  (C, G), and  $S_f$  (D, H). The four prioritization filters that were used to shortlist the regions are color-coded. Regions above the 0.1% FDR that passed all filters are shown in green. Specifically, the green region in the Amhara vs. LWK  $S_{\pi}$  and  $S_f$  statistics, position 84.7M, contains one gene (*DLG2*) and has  $S_{\pi}$  and  $S_f$  values of 2.16 and 2.85, respectively.

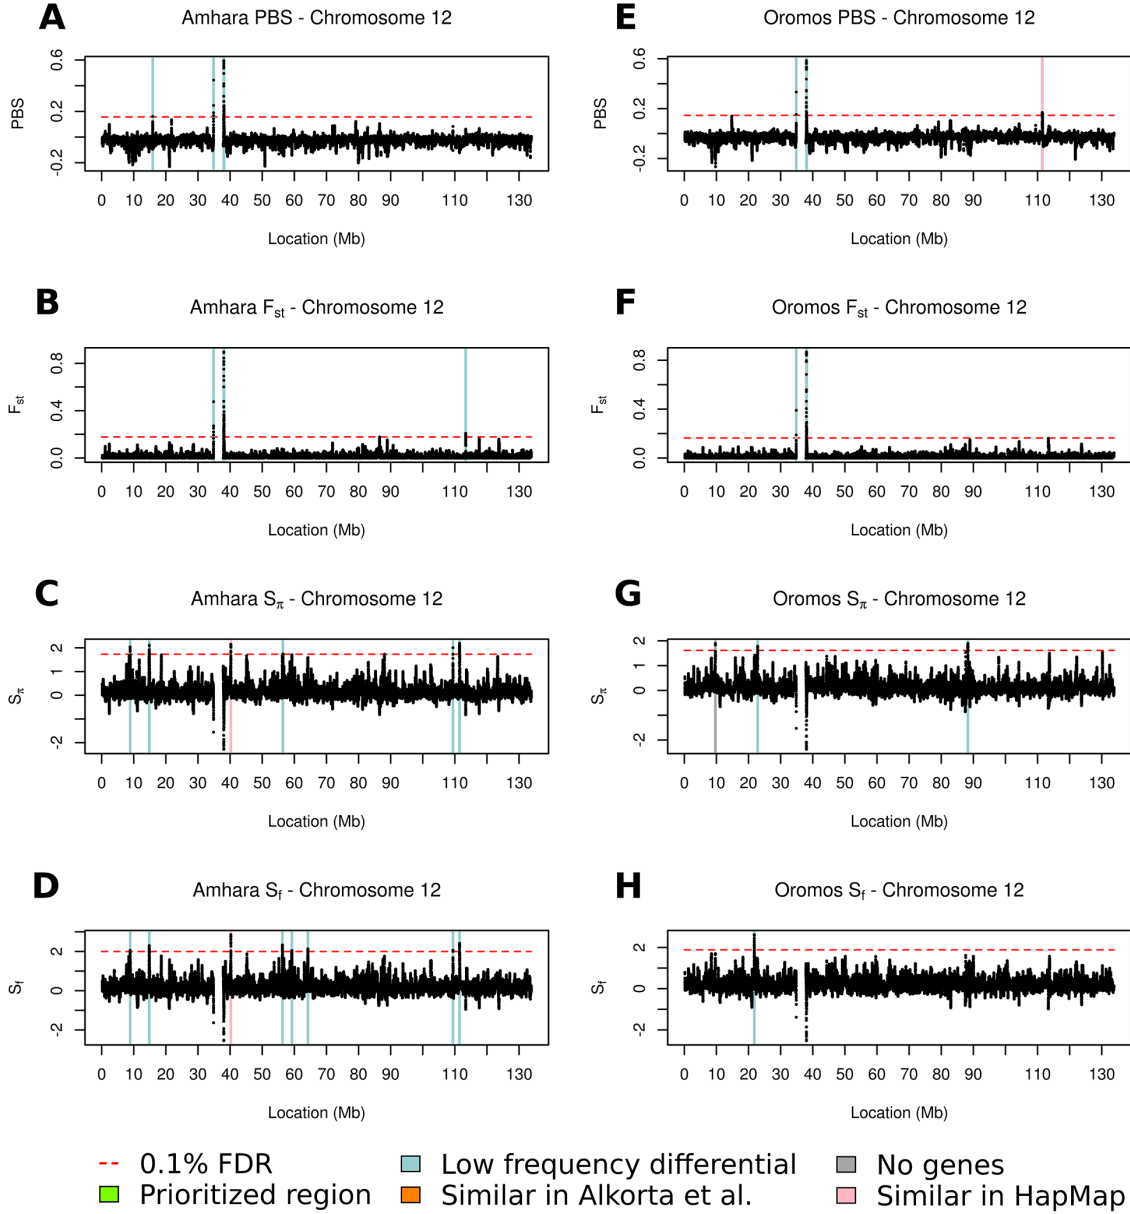

**Chromosome 12. Test statistic values in the Amhara (A-D) and Oromos (E-H) populations.** The tests shown are  $PBS$  (A, E),  $F_{st}$  (B, F),  $S_{\pi}$  (C, G), and  $S_f$  (D, H). The four prioritization filters that were used to shortlist the regions are color-coded. Regions above the 0.1% FDR that passed all filters are shown in green.



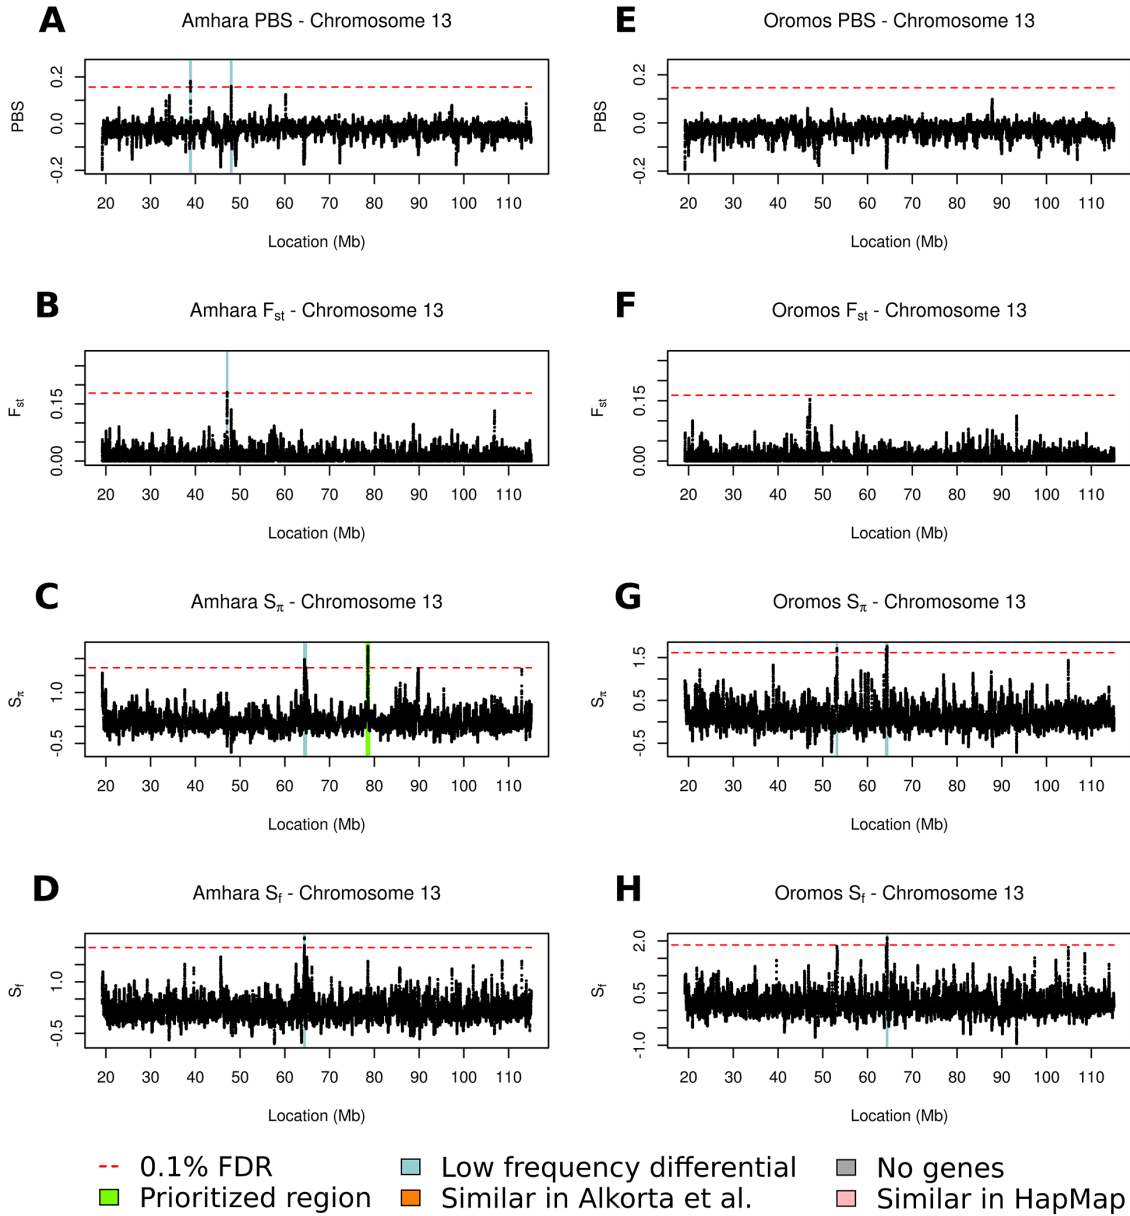

**Chromosome 13. Test statistic values in the Amhara (A-D) and Oromos (E-H) populations.** The tests shown are  $PBS$  (A, E),  $F_{st}$  (B, F),  $S_{\pi}$  (C, G), and  $S_f$  (D, H). The four prioritization filters that were used to shortlist the regions are color-coded. Regions above the 0.1% FDR that passed all filters are shown in green. Specifically, the green region in the Amhara vs. LWK  $S_{\pi}$  statistic, position 78.5M, contains one gene (*EDNRB*), and has  $S_{\pi}$  statistic value of 2.36.

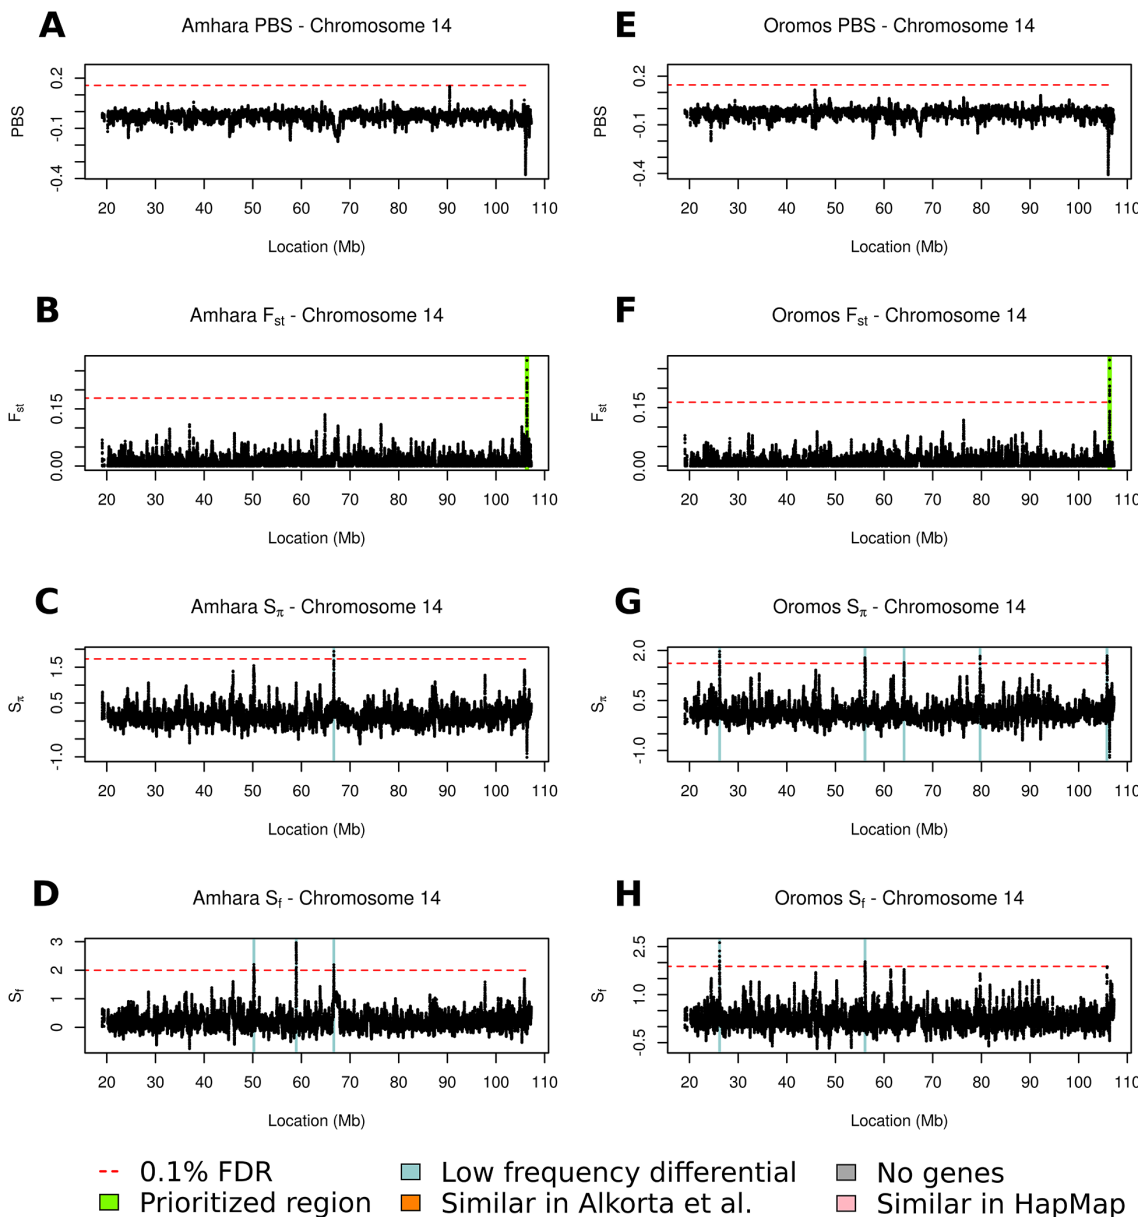

**Chromosome 14. Test statistic values in the Amhara (A-D) and Oromos (E-H) populations.** The tests shown are  $PBS$  (A, E),  $F_{st}$  (B, F),  $S_{\pi}$  (C, G), and  $S_{fi}$  (D, H). The four prioritization filters that were used to shortlist the regions are color-coded. Regions above the 0.1% FDR that passed all filters are shown in green. Specifically, the green region in the Amhara vs. LWK and Oromos vs. LWK  $F_{st}$  statistic, position 106.3M, contains one gene (*KIAA0125*), and has  $F_{st}$  statistic values of 0.28 and 0.27, respectively.

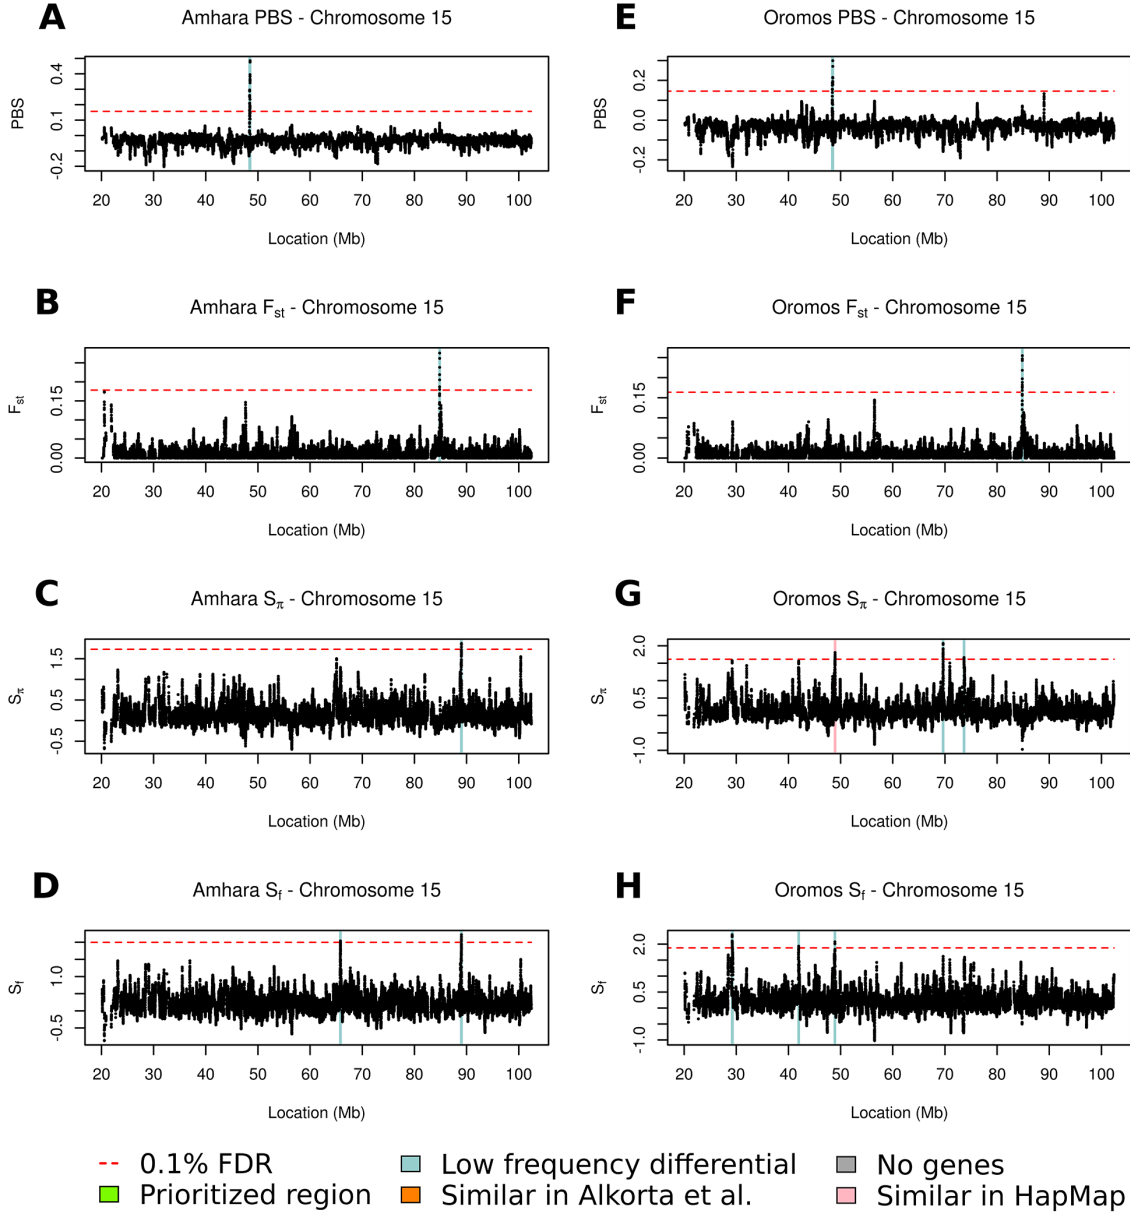

**Chromosome 15. Test statistic values in the Amhara (A-D) and Oromos (E-H) populations.** The tests shown are  $PBS$  (A, E),  $F_{st}$  (B, F),  $S_{\pi}$  (C, G), and  $S_f$  (D, H). The four prioritization filters that were used to shortlist the regions are color-coded. Regions above the 0.1% FDR that passed all filters are shown in green.

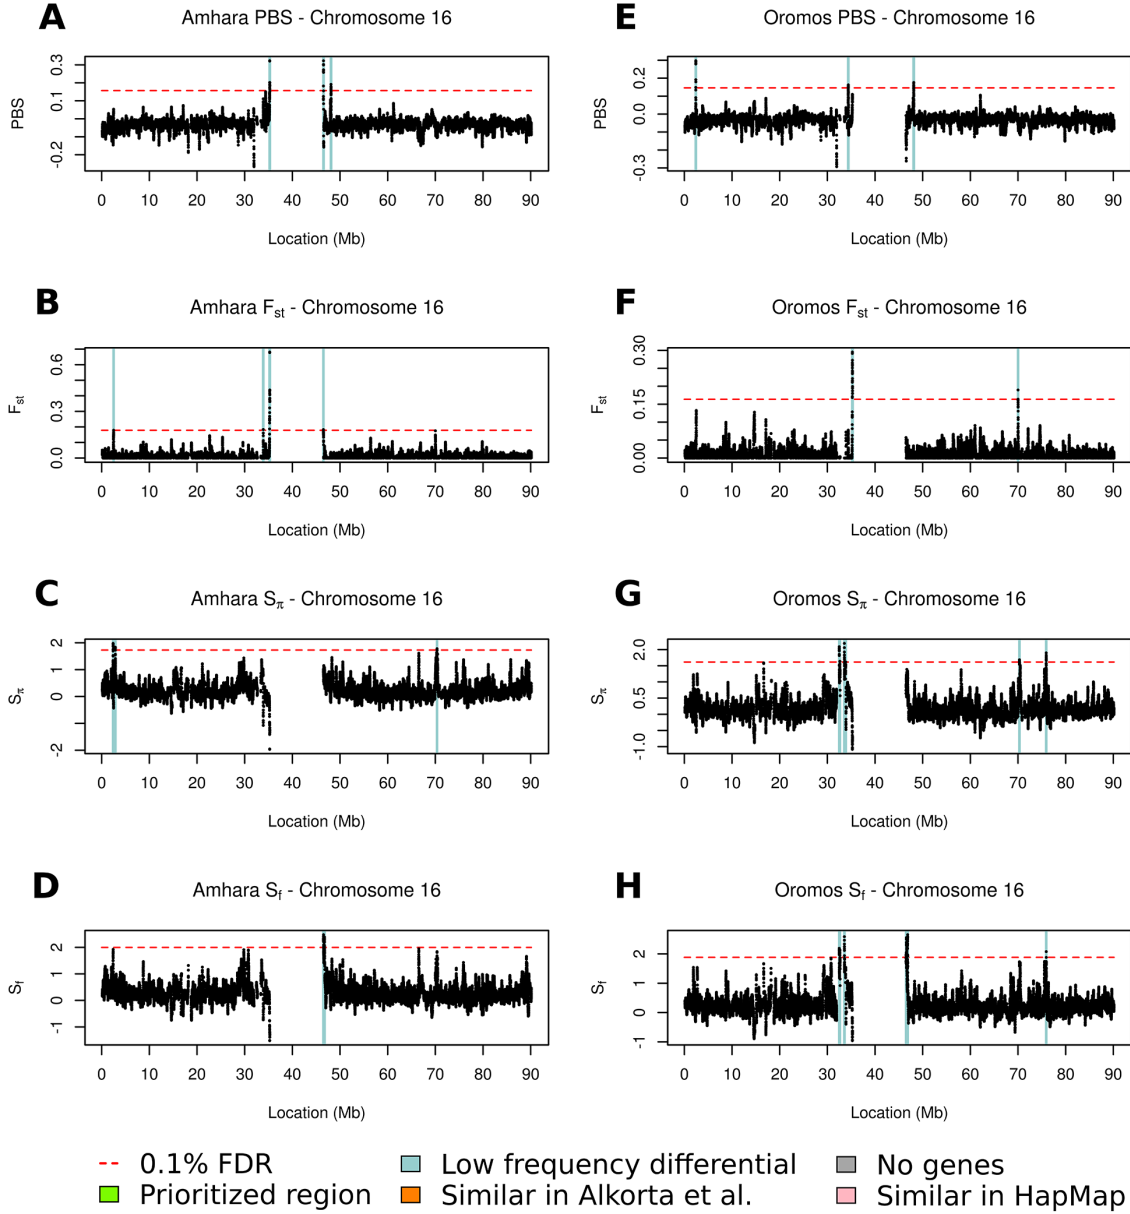

**Chromosome 16. Test statistic values in the Amhara (A-D) and Oromos (E-H) populations.** The tests shown are  $PBS$  (A, E),  $F_{st}$  (B, F),  $S_{\pi}$  (C, G), and  $S_f$  (D, H). The four prioritization filters that were used to shortlist the regions are color-coded. Regions above the 0.1% FDR that passed all filters are shown in green.

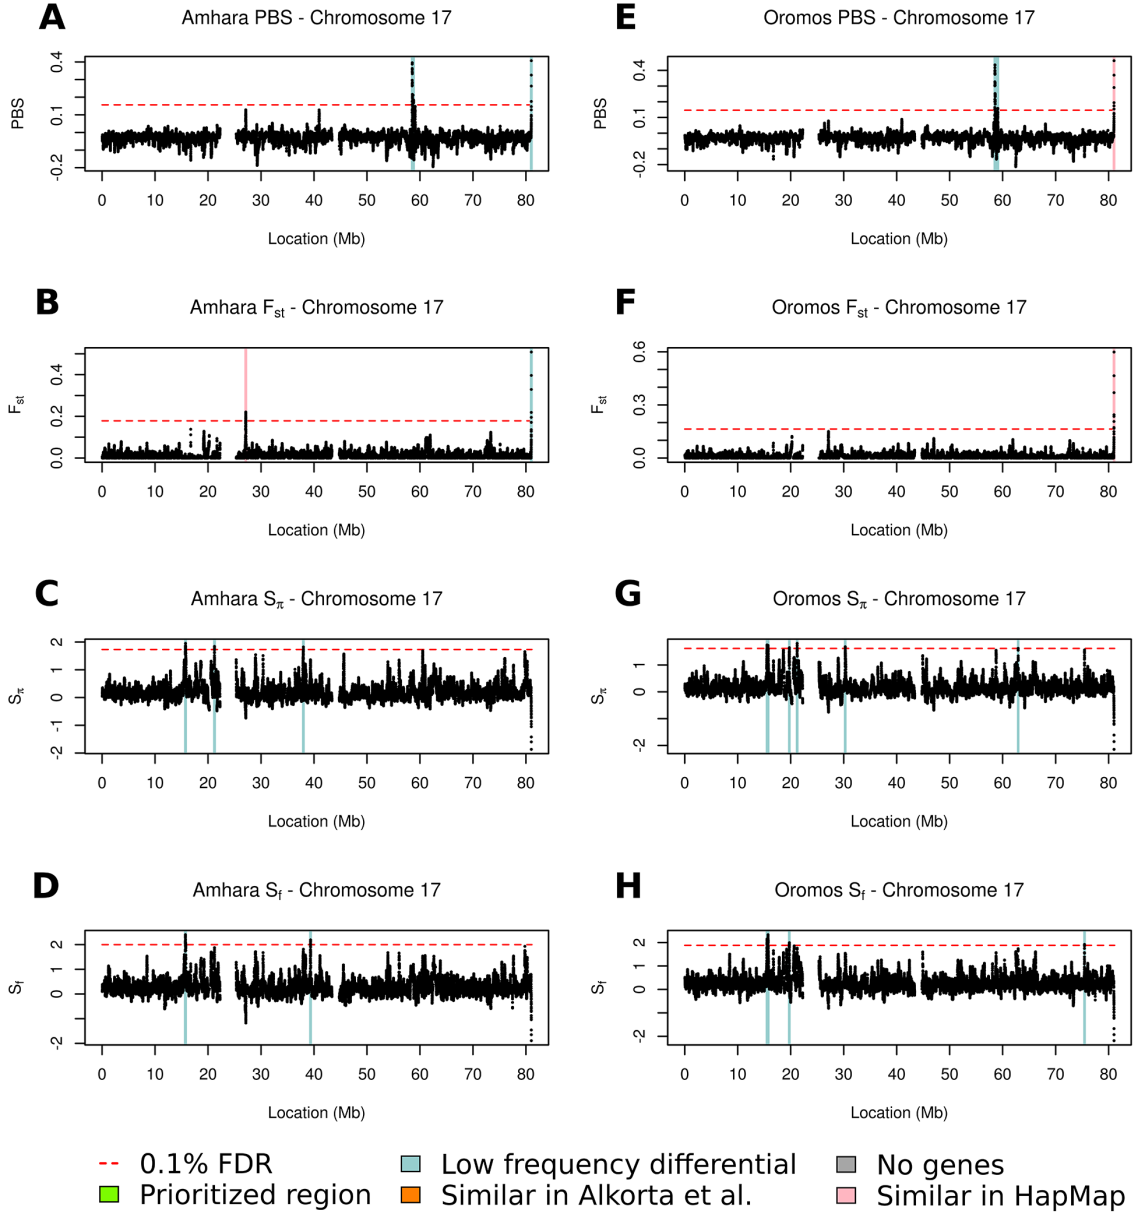

**Chromosome 17. Test statistic values in the Amhara (A-D) and Oromos (E-H) populations.** The tests shown are  $PBS$  (A, E),  $F_{st}$  (B, F),  $S_{\pi}$  (C, G), and  $S_f$  (D, H). The four prioritization filters that were used to shortlist the regions are color-coded. Regions above the 0.1% FDR that passed all filters are shown in green.

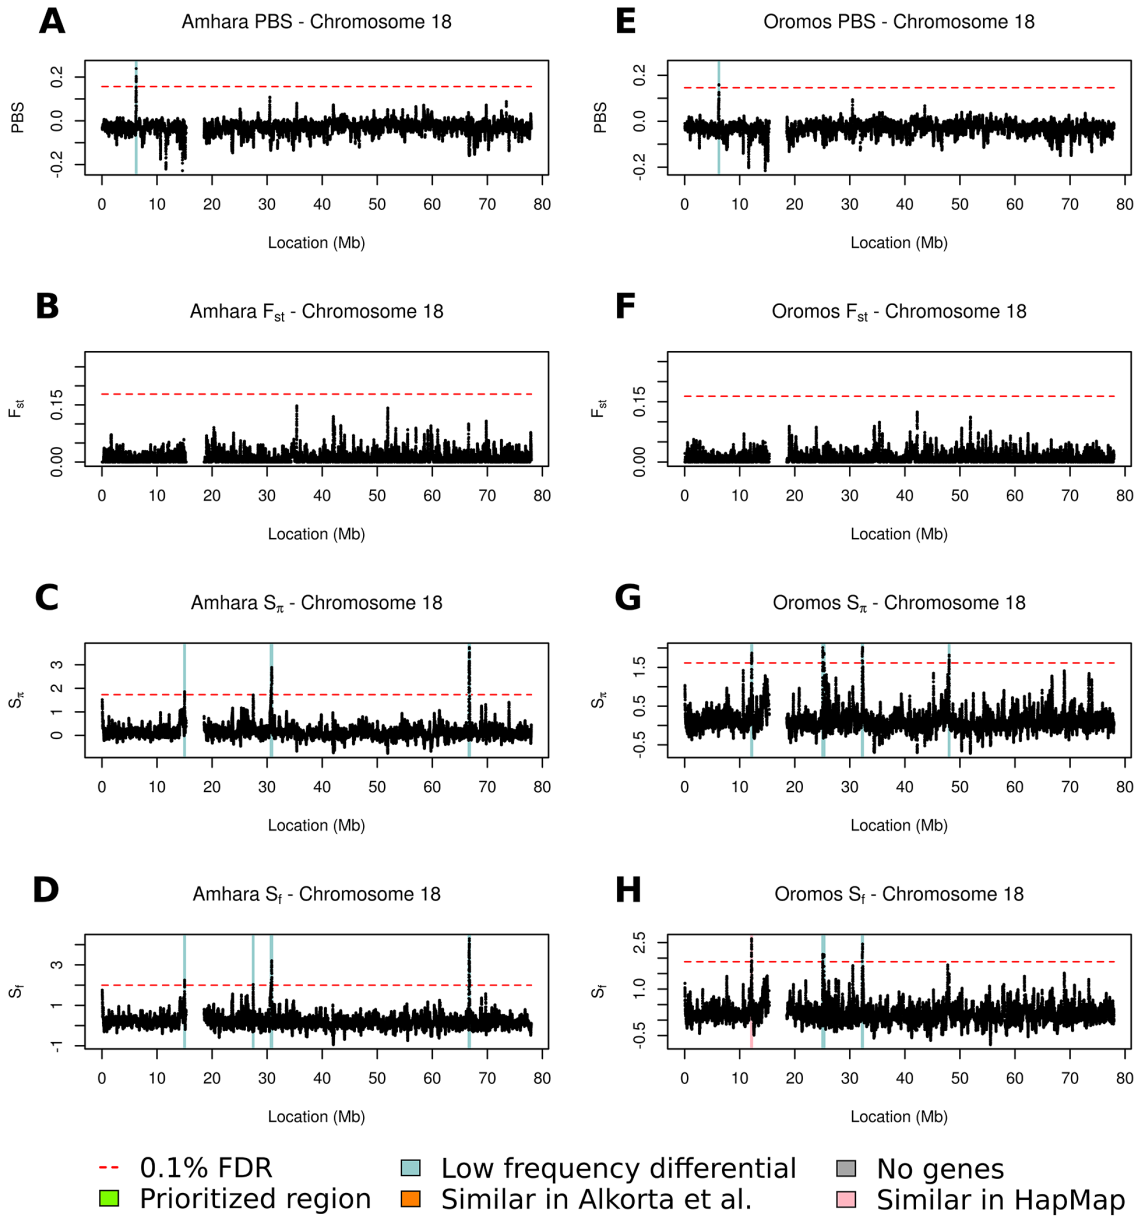

**Chromosome 18. Test statistic values in the Amhara (A-D) and Oromos (E-H) populations.** The tests shown are  $PBS$  (A, E),  $F_{st}$  (B, F),  $S_{\pi}$  (C, G), and  $S_f$  (D, H). The four prioritization filters that were used to shortlist the regions are color-coded. Regions above the 0.1% FDR that passed all filters are shown in green.

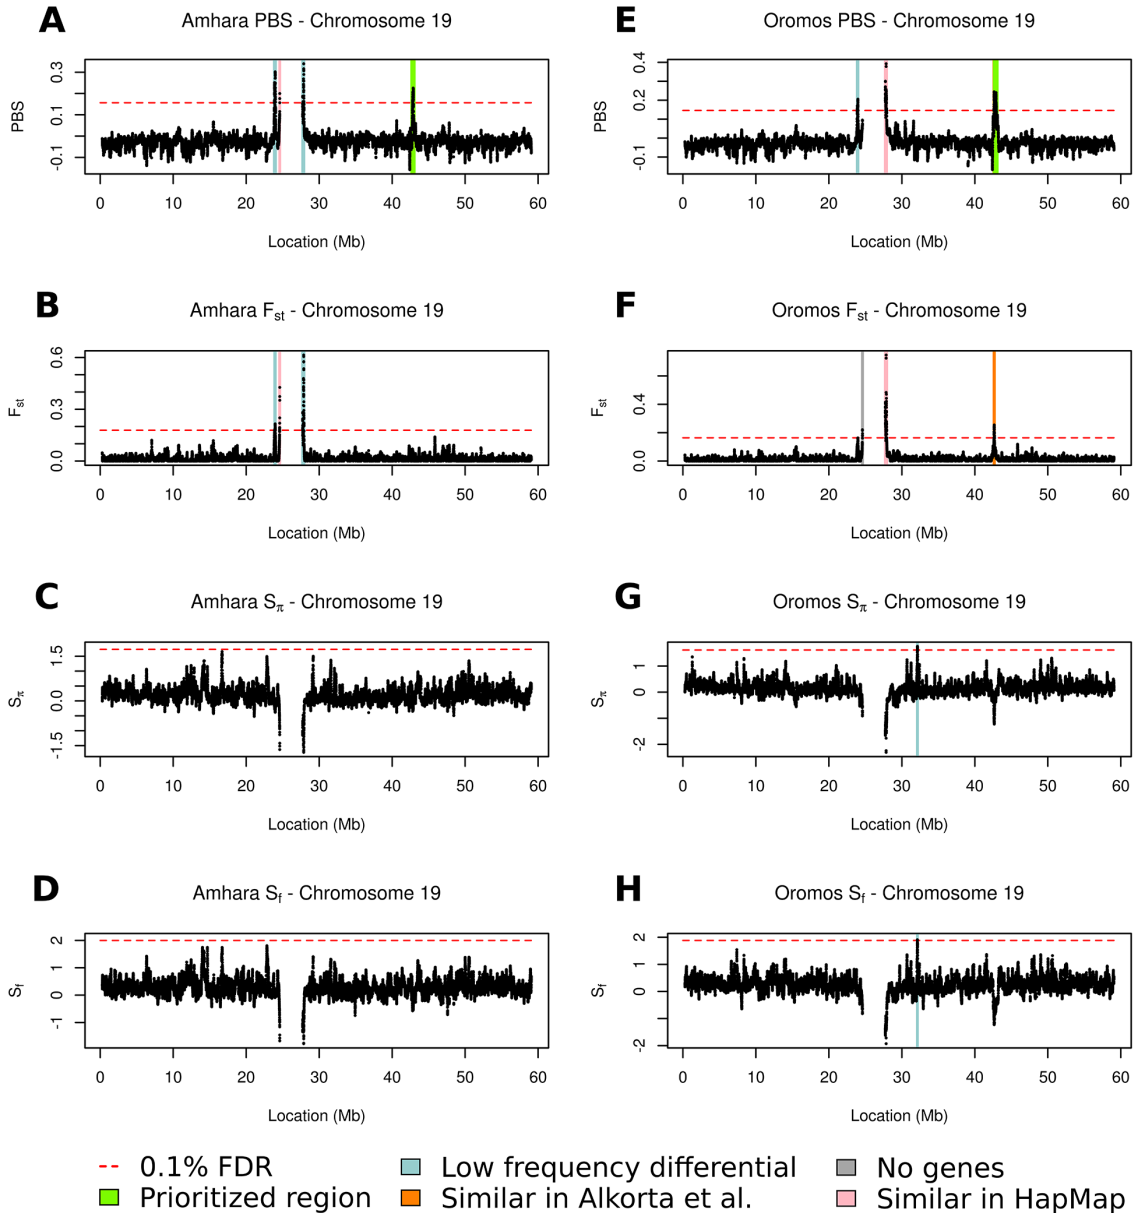

**Chromosome 19. Test statistic values in the Amhara (A-D) and Oromos (E-H) populations.** The tests shown are  $PBS$  (A, E),  $F_{st}$  (B, F),  $S_{\pi}$  (C, G), and  $S_f$  (D, H). The four prioritization filters that were used to shortlist the regions are color-coded. Regions above the 0.1% FDR that passed all filters are shown in green. Specifically, the green region in both the Amhara vs. LWK and Oromos vs. LWK  $PBS$  statistic, position 42.74-42.97M, contains ten genes (*GSK3A*, *ERF*, *CIC*, *PFAH1B3*, *PRR19*, *TMEM145*, *MEGF8*, *CNFN*, *LIPE*, and *CXCL17*), and has  $PBS$  statistic values of 0.226 and 0.24, respectively.

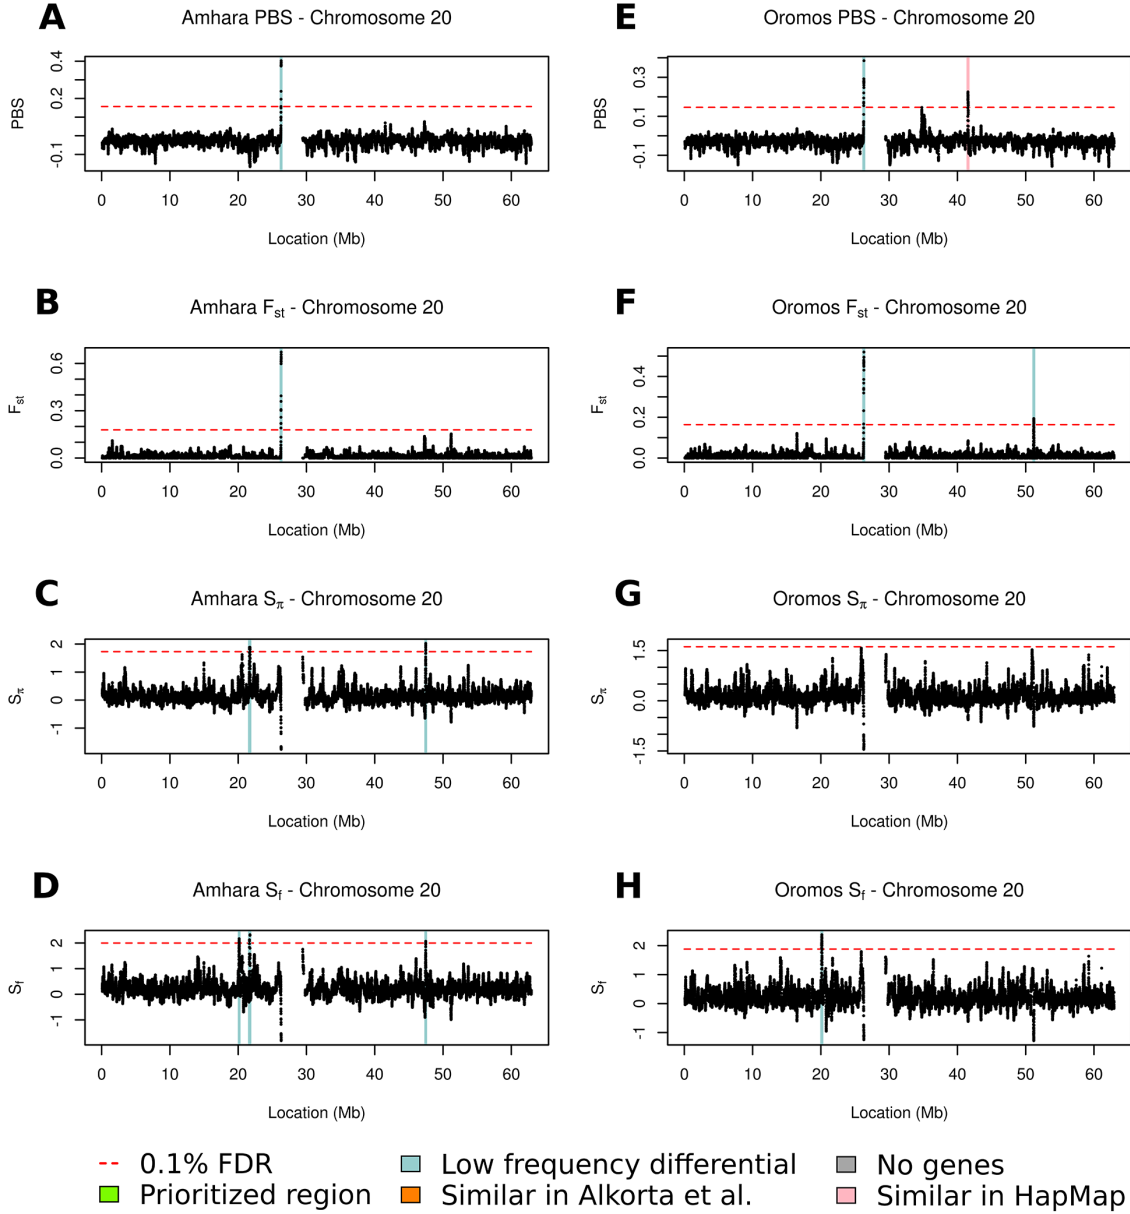

**Chromosome 20. Test statistic values in the Amhara (A-D) and Oromos (E-H) populations.** The tests shown are  $PBS$  (A, E),  $F_{st}$  (B, F),  $S_{\pi}$  (C, G), and  $S_f$  (D, H). The four prioritization filters that were used to shortlist the regions are color-coded. Regions above the 0.1% FDR that passed all filters are shown in green.



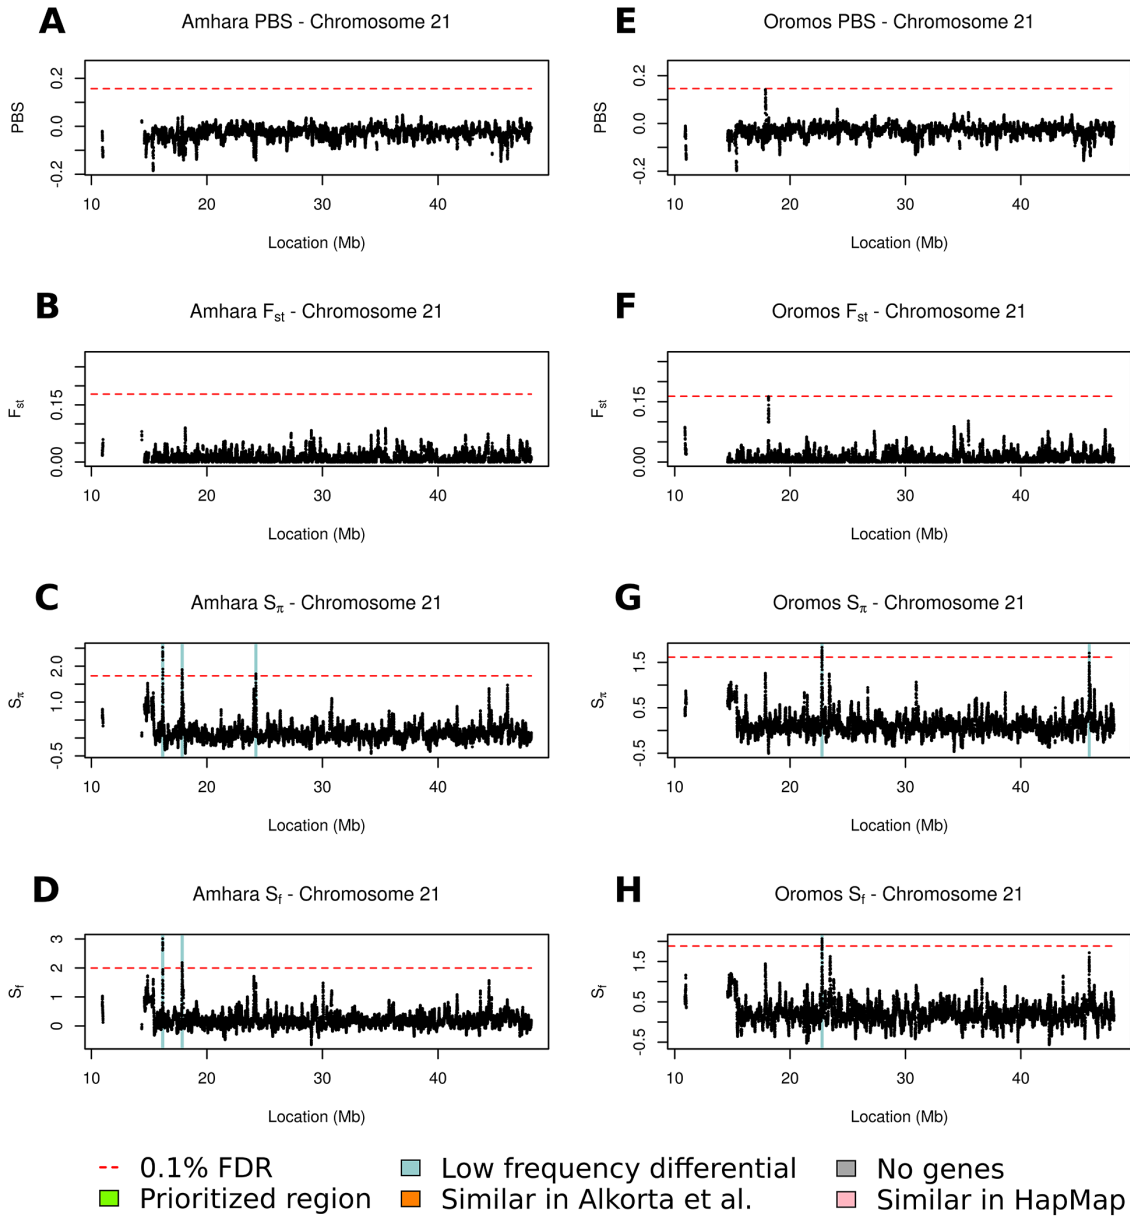

**Chromosome 21. Test statistic values in the Amhara (A-D) and Oromos (E-H) populations.** The tests shown are  $PBS$  (A, E),  $F_{st}$  (B, F),  $S_{\pi}$  (C, G), and  $S_f$  (D, H). The four prioritization filters that were used to shortlist the regions are color-coded. Regions above the 0.1% FDR that passed all filters are shown in green.

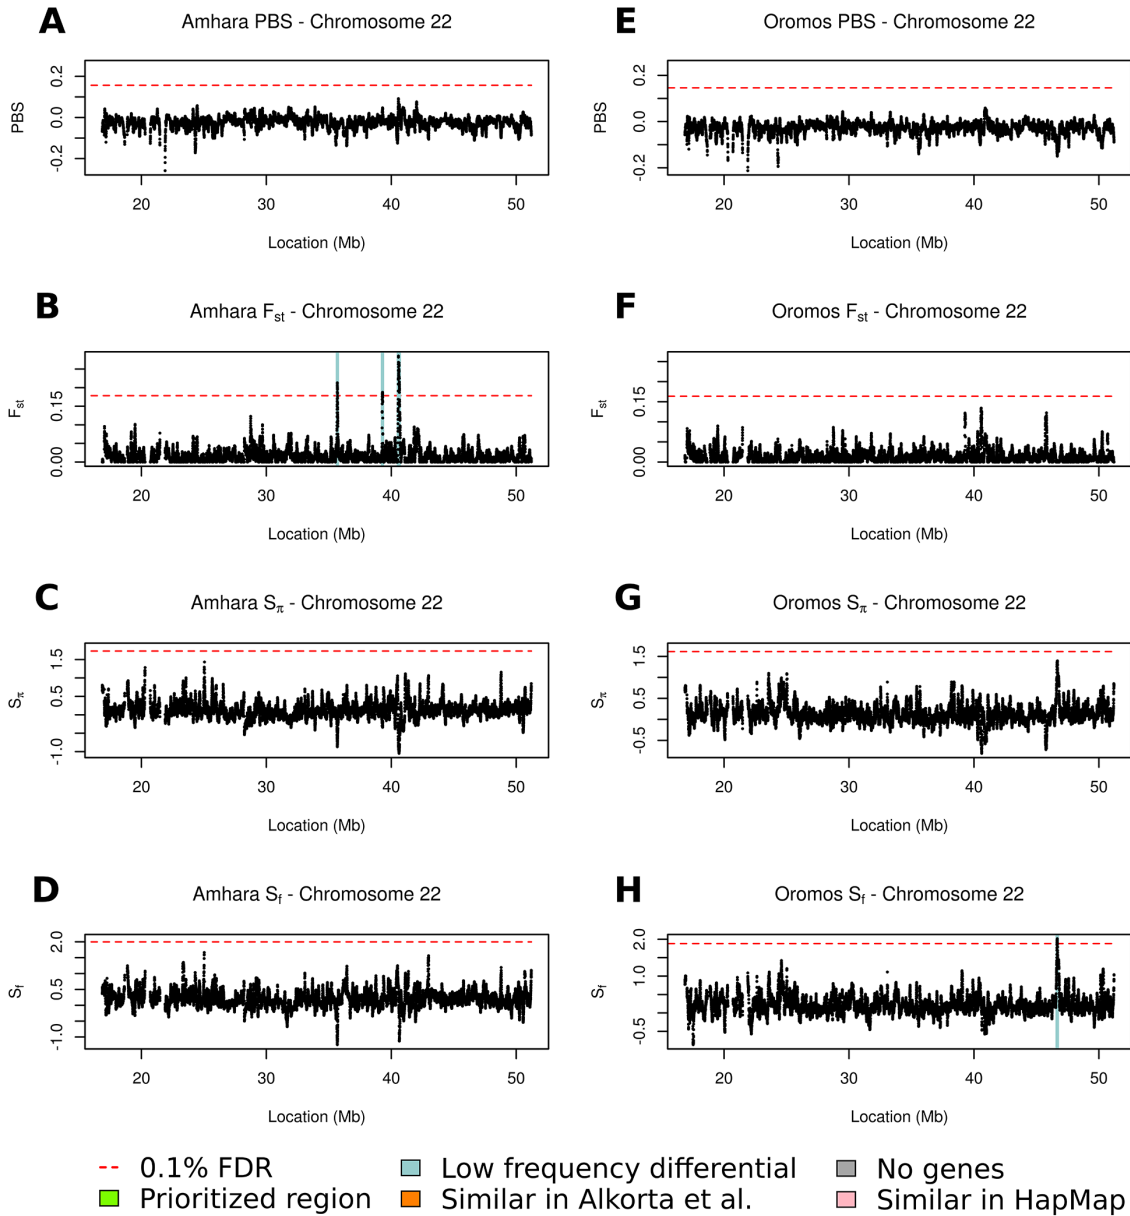

**Chromosome 22.** Test statistic values in the Amhara (A-D) and Oromos (E-H) populations. The tests shown are  $PBS$  (A, E),  $F_{st}$  (B, F),  $S_{\pi}$  (C, G), and  $S_f$  (D, H). The four prioritization filters that were used to shortlist the regions are color-coded. Regions above the 0.1% FDR that passed all filters are shown in green.

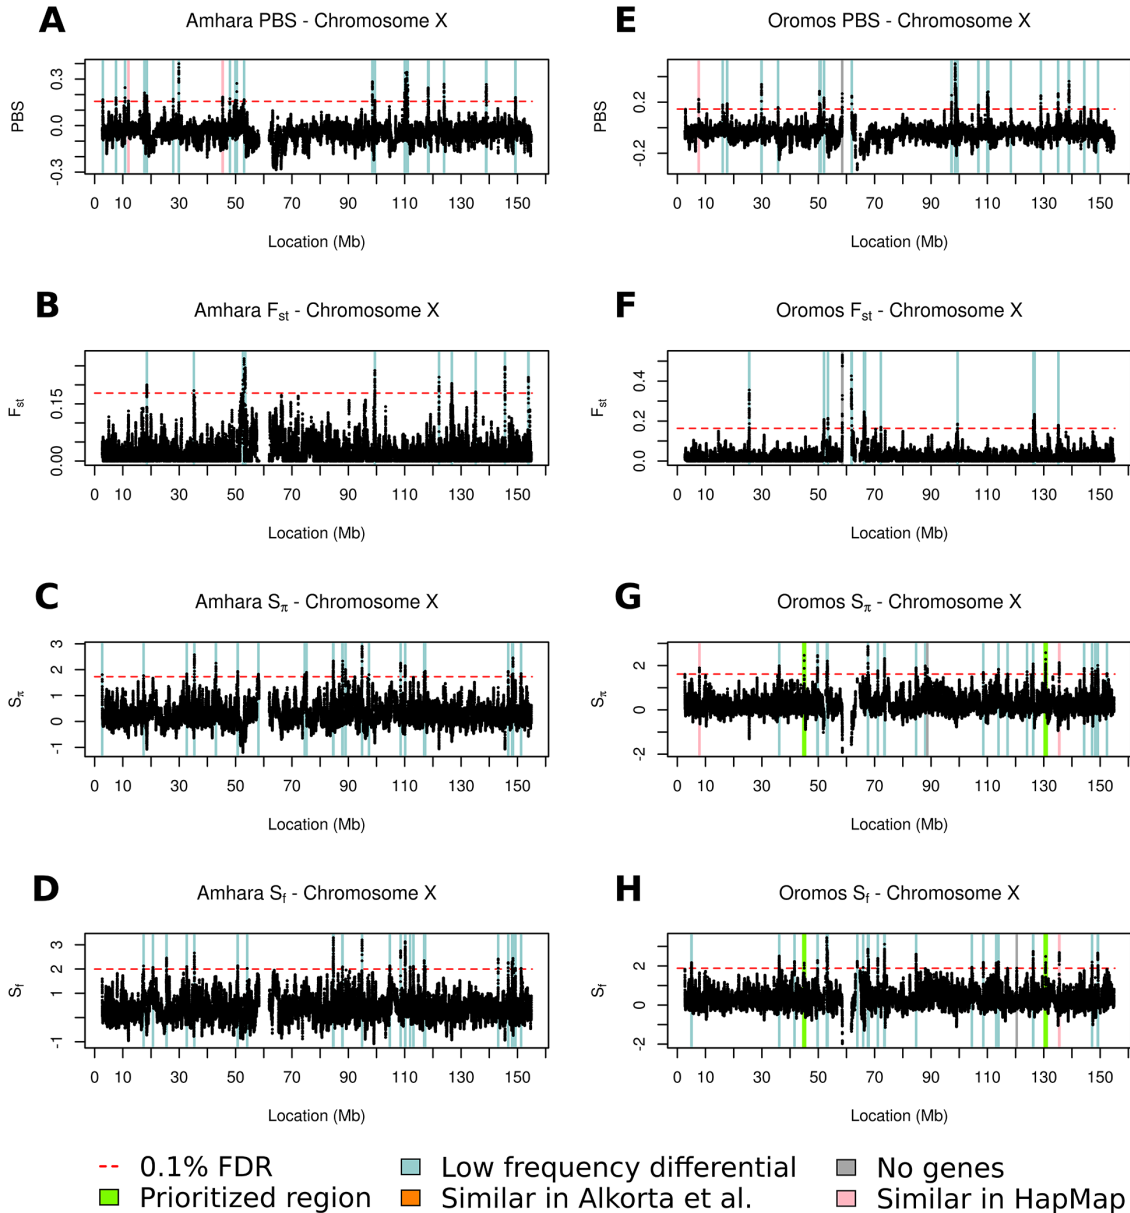

**Chromosome X. Test statistic values in the Amhara (A-D) and Oromos (E-H) populations.** The tests shown are  $PBS$  (A, E),  $F_{st}$  (B, F),  $S_{\pi}$  (C, G), and  $S_f$  (D, H). The four filters that were used to shortlist the regions are color-coded. Regions above the 0.1% FDR that passed all filters are shown in green. Specifically, the (left) green region in the Oromos vs. LWK  $S_{\pi}$  and  $S_f$  statistics, position 45.0M, contains one gene (*CXorf36*), and has  $S_{\pi}$  and  $S_f$  statistic values of 2.46 and 2.15, respectively. In addition, the (right) green region in the Oromos vs. LWK  $S_{\pi}$  and  $S_f$  statistic, position 130M, contains one gene (*OR13H1*), and has  $S_{\pi}$  and  $S_f$  statistic value of 2.58 and 2.49, respectively.
