# Supplementary material for: Whole genome sequencing of Ethiopian highlanders reveals conserved hypoxia tolerance genes
Source: PubMed Central journal article supplement (PMC4054780; doi:10.1186/gb-2014-15-2-r36), 2014-02-20
Supplement: gb-2014-15-2-r36-S11.pdf [file gb-2014-15-2-r36-S11.pdf]

**Table S2. Nonsynonymous SNPs with significant frequency differential in one of the eight prioritized regions.**

| <b>Chr</b> | <b>Position</b> | <b>dbSNP</b> | <b>Gene</b> | <b>Transcript</b> | <b>AA Mutation</b> | <b>SIFT P-val</b> |
|------------|-----------------|--------------|-------------|-------------------|--------------------|-------------------|
| chr9       | 34017106        | rs1785506    | UBAP2       | NM_018449         | R14Q               | 0.2               |
| chr19      | 42906914        | rs7246232    | LIPE        | NM_005357         | R938S              | 0.53              |
| chr19      | 42931004        | rs16975750   | LIPE        | NM_005357         | Y100H              | 0.54              |
