# Supplementary material for: Whole genome sequencing of Ethiopian highlanders reveals conserved hypoxia tolerance genes
Source: PubMed Central journal article supplement (PMC4054780; doi:10.1186/gb-2014-15-2-r36), 2014-02-20
Supplement: gb-2014-15-2-r36-S16.pdf [file gb-2014-15-2-r36-S16.pdf]

**Table S4. Sequencing depth and coverage statistics per individual in the sample.**

| <b>Sample</b> | <b>Total Reads</b> | <b>% Mapped</b> | <b>Mean Depth</b> | <b>% Coverage</b> |
|---------------|--------------------|-----------------|-------------------|-------------------|
| 01E           | 540,766,668        | 97.97%          | 17.17x            | 99.05%            |
| 02E           | 597,069,058        | 97.98%          | 18.93x            | 99.11%            |
| 04E           | 635,419,642        | 97.89%          | 20.15x            | 99.03%            |
| 06E           | 619,664,584        | 97.64%          | 18.86x            | 99.06%            |
| 07E           | 603,759,184        | 97.84%          | 19.08x            | 99.10%            |
| 09E           | 593,692,762        | 98.12%          | 19.01x            | 99.09%            |
| 11E           | 548,821,162        | 98.11%          | 17.61x            | 99.38%            |
| 12E           | 493,822,992        | 97.70%          | 15.76x            | 99.32%            |
| 13E           | 537,399,998        | 97.91%          | 16.77x            | 99.27%            |
| 14E           | 604,645,336        | 97.98%          | 19.01x            | 99.05%            |
| 16E           | 564,564,486        | 97.81%          | 17.79x            | 99.28%            |
| 17E           | 572,847,150        | 97.40%          | 17.69x            | 99.28%            |
| 20E           | 572,320,746        | 98.30%          | 18.27x            | 99.30%            |
