# Supplementary material for: Whole genome sequencing of Ethiopian highlanders reveals conserved hypoxia tolerance genes
Source: PubMed Central journal article supplement (PMC4054780; doi:10.1186/gb-2014-15-2-r36), 2014-02-20
Supplement: gb-2014-15-2-r36-S17.pdf [file gb-2014-15-2-r36-S17.pdf]

**Table S5. Number of variants removed in each filtering step, for the Luhya and Oromos populations.**

| <b>Filtering Step</b>            | <b>Oromos</b> | <b>Luhya</b> |
|----------------------------------|---------------|--------------|
| GATK Region Filtering (in Luhya) | -             | 602,188      |
| Satellite DNA filtering          | 30,684        | 70,398       |
| Coverage Filtering (in Luhya)    | 33,222        | 203,326      |
